1 *Maturity2*, a novel regulator of flowering time in *Sorghum bicolor*, increases  
2 expression of *SbPRR37* and *SbCO* in long days delaying flowering  
3

4  
5 Running title: *Maturity2* - a novel regulator of flowering time in *Sorghum bicolor*  
6

7  
8  
9 Anna L. Casto<sup>1¶</sup>, Ashley J. Mattison<sup>1¶</sup>, Sara N. Olson<sup>1</sup>, Manish Thakran<sup>1</sup>, William L. Rooney<sup>2</sup>,  
10 John E. Mullet<sup>1\*</sup>  
11

12  
13  
14  
15  
16  
17  
18 <sup>1</sup> Biochemistry and Biophysics Department, Texas A&M University, College Station, TX, United  
19 States of America  
20

21 <sup>2</sup> Soil and Crop Science Department, Texas A&M University, College Station, TX, United States  
22 of America  
23

24  
25  
26  
27  
28 \* Corresponding author  
29

30 E-mail: [jmullet@tamu.edu](mailto:jmullet@tamu.edu) (JEM)  
31  
32  
33

34 <sup>¶</sup>These authors contributed equally to this work  
35

## 36 **Abstract**

37 *Sorghum bicolor* is a drought-resilient facultative short-day C4 grass that is grown for grain,  
38 forage, and biomass. Adaptation of sorghum for grain production in temperate regions resulted  
39 in the selection of mutations in *Maturity* loci ( $Ma_1 - Ma_6$ ) that reduced photoperiod sensitivity  
40 and resulted in earlier flowering in long days. Prior studies identified the genes associated with  
41  $Ma_1$  (*PRR37*),  $Ma_3$  (*PHYB*),  $Ma_5$  (*PHYC*) and  $Ma_6$  (*GHD7*) and characterized their role in the  
42 flowering time regulatory pathway. The current study focused on understanding the function and  
43 identity of  $Ma_2$ .  $Ma_2$  delayed flowering in long days by selectively enhancing the expression of  
44 *SbPRR37* ( $Ma_1$ ) and *SbCO*, genes that co-repress the expression of *SbCN12*, a source of florigen.  
45 Genetic analysis identified epistatic interactions between  $Ma_2$  and  $Ma_4$  and located QTL  
46 corresponding to  $Ma_2$  on SBI02 and  $Ma_4$  on SBI10. Positional cloning and whole genome  
47 sequencing identified a candidate gene for  $Ma_2$ , Sobic.002G302700, which encodes a SET and  
48 MYND (SYMD) domain lysine methyltransferase. Nine sorghum genotypes previously  
49 identified as recessive for  $Ma_2$  contained the mutated version of Sobic.002G302700 present in  
50 80M ( $ma_2$ ).

51

## 52 **Introduction**

53 *Sorghum bicolor* is a drought resilient, short-day C4 grass that is grown globally for  
54 grain, forage and biomass [1–4]. Precise control of flowering time is critical to achieve optimal  
55 yields of sorghum crops in specific target production locations/environments. Sorghum  
56 genotypes that have delayed flowering in long days due to high photoperiod sensitivity are high-  
57 yielding sources of biomass for production of biofuels and specialty bio-products [3,5]. In

58 contrast, grain sorghum was adapted for production in temperate regions by selecting genotypes  
59 that have reduced photoperiod sensitivity resulting in earlier flowering and reduced risk of  
60 exposure to drought, heat, or cold temperatures during the reproductive phase. A range of  
61 flowering times are found among forage and sweet sorghums [6]. Sweet sorghum genotypes with  
62 longer vegetative growth duration have larger stems that have greater potential for sucrose  
63 accumulation [6–8].

64 Flowering time is regulated by development, day length, phytohormones, shading,  
65 temperature, and the circadian clock [9–11]. In the long-day plant *Arabidopsis thaliana*,  
66 circadian and light signals are integrated to increase the expression of *FLOWERING LOCUS T*  
67 (*FT*) and flowering in long days. *FT* encodes a signaling protein synthesized in leaves that  
68 moves through the phloem to the shoot apical meristem (SAM) where it interacts with  
69 *FLOWERING LOCUS D* (*FD*) and reprograms the vegetative shoot apical meristem for  
70 reproductive development [12,13]. Expression of circadian clock genes such as *LATE*  
71 *ELONGATED HYPOCOTYL* (*LHY*) and *TIMING OF CAB1* (*TOC1*) regulate the expression of  
72 the clock output gene *GIGANTEA* (*GI*) and genes in the flowering time pathway [14–16].  
73 Photoperiod and circadian clock signals are integrated to control the expression and stability of  
74 *CONSTANS* (*CO*) an activator of *FT* expression [17]. Under inductive long day (LD)  
75 photoperiods, *CO* promotes the expression of *FT* which induces flowering in *Arabidopsis* [18].

76 Many of the genes in the *Arabidopsis* flowering time pathway are found in sorghum and  
77 other grass species such as *Oryza sativa* (rice) [10] and maize [19], however, the regulation of  
78 flowering time in these grasses has diverged from *Arabidopsis* in several important ways. Both  
79 rice and sorghum are facultative short-day (SD) plants. In rice, the expression of the *FT-like* gene  
80 *Heading date 3a* (*Hd3a*) is promoted in SD [20]. In sorghum, expression of two different *FT-*

81 *like* genes, *SbCN8* and *SbCN12*, is induced when plants are shifted from LD to SD [21,22]. In  
82 contrast to *Arabidopsis*, the rice and sorghum homologs of *CO* (rice *Heading date1*, *OsHd1*;  
83 *SbCO*) repress flowering in LD [10,23]. Rice and sorghum encode two additional grass-specific  
84 regulators of flowering *Ehd1* and *Ghd7*. *Early heading date1* (*Ehd1*) activates the expression of  
85 *FT*-like genes, and *Grain number, plant height and heading date7* (*Ghd7*) represses the  
86 expression of *EHD1* and flowering [24,25]. When sorghum is grown in short days, *SbEhd1* and  
87 *SbCO* induce the expression of *SbCN8* and *SbCN12*, leading to floral induction [21,22,26,27].

88 Under field conditions, time to flowering in sorghum varies from ~50 to >150 days after  
89 planting (DAP) depending on genotype, planting location and date (latitude/day-length), and the  
90 environment. A tall and “ultra-late” flowering sorghum variety called Milo Maize was  
91 introduced to the United States in the late 1800s [28]. Shorter and earlier flowering Milo  
92 genotypes such as Early White Milo and Dwarf Yellow Milo were selected from the introduced  
93 Milo genotype to promote improved grain yield in temperate regions of the US [1,28,29].  
94 Genetic analysis determined that mutations in three independently segregating *Maturity* (*Ma*)  
95 loci (*Ma<sub>1</sub>*, *Ma<sub>2</sub>*, *Ma<sub>3</sub>*) were responsible for early flowering times in the Milo genotypes. A cross  
96 between Early White Milo (*ma<sub>1</sub>Ma<sub>2</sub>Ma<sub>3</sub>*) and Dwarf Yellow Milo (*Ma<sub>1</sub>ma<sub>2</sub>ma<sub>3</sub>*) was used to  
97 construct a set of Milo maturity standards, a series of nearly isogenic lines that differ at one or  
98 more of the *Maturity* loci (Quinby and Karper 1945, Quinby 1966, Quinby, 1967). A fourth  
99 *Maturity* locus (*Ma<sub>4</sub>*) was discovered in crosses of Milo (*Ma<sub>4</sub>*) and Hegari (*ma<sub>4</sub>*) [30]. More  
100 recent studies identified *Ma<sub>5</sub>* and *Ma<sub>6</sub>* [31]. Subsequent research showed that all of the Milos are  
101 dominant for *Ma<sub>5</sub>* and recessive for *ma<sub>6</sub>* [23,26]. In addition to these six *Ma* loci, many other  
102 flowering time quantitative trait loci (QTL) have been identified in sorghum [2,32–35].

103 Additional research has linked several of these QTL to genes such as *SbEHD1* and *SbCO* that are  
104 activators of *SbCN8* and *SbCN12* expression, sources of florigen in sorghum.

105 The genes corresponding to four of the six *Maturity* loci have been identified. *Ma<sub>1</sub>*, the  
106 locus with the greatest influence on flowering time photoperiod sensitivity, encodes *SbPRR37*, a  
107 pseudo-response regulator that inhibits flowering in LD [21]. *Ma<sub>3</sub>* encodes phytochrome B [36],  
108 *Ma<sub>5</sub>* encodes phytochrome C [23], and *Ma<sub>6</sub>* encodes *Ghd7* a repressor of flowering in long days  
109 [26]. The genes corresponding to *Ma<sub>2</sub>* and *Ma<sub>4</sub>* have not been identified but recessive alleles at  
110 either locus results in early flowering in long days in genotypes that are photoperiod sensitive  
111 (*Ma<sub>1</sub>*) [28]. Prior studies also noted that genotypes recessive for *Ma<sub>2</sub>* flower later in genotypes  
112 that are photoperiod insensitive and recessive for *Ma<sub>1</sub>* and *Ma<sub>6</sub>* [28].

113 In this study, the impact of *Ma<sub>2</sub>* alleles on the expression of genes in the sorghum  
114 flowering time pathway was characterized. A QTL corresponding to *Ma<sub>2</sub>* was mapped and a  
115 candidate gene for *Ma<sub>2</sub>* identified by fine mapping and genome sequencing. The results show  
116 that *Ma<sub>2</sub>* enhances *Ma<sub>1</sub>* (*SbPRR37*) and *SbCO* expression consistent with the impact of *Ma<sub>2</sub>*  
117 alleles on flowering time in genotypes that vary in *Ma<sub>1</sub>* alleles.

118

## 119 **Methods**

### 120 **Plant growing conditions and populations**

121 The cross of 100M and 80M was carried out by the Sorghum Breeding Lab at Texas  
122 A&M University in College Station, TX. F<sub>1</sub> plants were grown in the field in Puerto Rico and  
123 self-pollinated to generate the F<sub>2</sub> population used in this study. The 100M/80M F<sub>2</sub> population

124 was planted in the spring of 2008 at the Texas A&M Agrilife Research Farm in Burleson  
125 County, Texas (near College Station, TX).

126 The cross of Hegari and 80M was made in the greenhouse at Texas A&M University in  
127 College Station, TX. F<sub>1</sub> plants were confirmed and self-pollinated to generate the F<sub>2</sub> population  
128 used in this study. The Hegari/80M F<sub>2</sub> population (n = 432) was planted in the spring of 2011 in  
129 the greenhouse in 18 L nursery pots in a 2:1 mixture of Coarse Vermiculite (SunGro  
130 Horticulture, Bellevue, WA) to brown pasture soil (American Stone and Turf, College Station,  
131 TX). All subsequent generations of Hegari/80M for fine mapping were grown in similar  
132 conditions. Greenhouse-grown plants were watered as needed and fertilized every two weeks  
133 using Peters general purpose 20-20-20 (Scotts Professional).

134 For circadian gene expression experiments, 100M and 80M genotypes were planted in  
135 MetroMix 900 (Sungro Agriculture) in 6 L pots, and thinned to 3 plants/pot after 2 weeks. Plants  
136 were grown in the greenhouse under 14 h days until 30 days after planting (DAP). After 30 days,  
137 the plants were moved into growth chambers and allowed to acclimate for 3 days. The growth  
138 chamber was set to 30°C and 14/10h L/D for the 3 days of entrainment and the first 24 h of  
139 tissue collection. The lights were changed to constant light for the second 24 h of tissue  
140 collection.

141

## 142 **QTL mapping and multiple-QTL analysis**

143 DNA was extracted from leaf tissue for all individuals described above as described in  
144 the FastDNA Spin Kit manual (MP Biomedicals). All individuals in each mapping or HIF  
145 population were genotyped by Digital Genotyping using FseI digestion enzyme as described in  
146 Morishige et al [37]. DNA fragments were sequenced using the Illumina GAII platform and the

147 reads were mapped back to the sorghum reference genome (v1.0, Phytozome v6). Genetic maps  
148 were created using MapMaker 3.0B with the Kosambi function [38]. QTL were mapped using  
149 WinQTLCartographer (v2.5.010) using composite interval mapping with a 1.0 cM walk speed  
150 and forward and backward model selection [39]. The threshold was set using 1000 permutations  
151 and  $\alpha = 0.05$ . Upon release of v3.1 of the sorghum reference genome, the QTL coordinates were  
152 updated [40].

153 To look for possible gene interactions multiple-QTL analysis was used in the Hegari/80M  
154 F<sub>2</sub> population. A single QTL analysis using the EM algorithm initially identified two primary  
155 additive QTL which were used to seed model selection. The method of Manichaikul et al. [41]  
156 was employed for model selection as implemented in R/qtl for multiple-QTL analysis [42].  
157 Computational resources on the WSGI cluster at Texas A&M were used to calculate the  
158 penalties for main effects, heavy interactions, and light interactions. These penalties were  
159 calculated from 24,000 permutations for flowering time to find a significance level of 5% in the  
160 context of a two-dimensional, two-genome scan.

161

## 162 **Fine mapping of the *Ma<sub>2</sub>* QTL**

163 All fine mapping populations for the *Ma<sub>2</sub>* QTL were derived from F<sub>2</sub> individuals from the  
164 Hegari/80M population. The genetic distance spanning the *Ma<sub>2</sub>* locus is 2 cM corresponding to a  
165 physical distance of ~1.8 Mbp, so 1000 progeny would be required to obtain 20 recombinants  
166 within the *Ma<sub>2</sub>* QTL region. Six individuals that were heterozygous across the *Ma<sub>2</sub>* QTL were  
167 self-pollinated to generate six heterogeneous inbred families (HIFs) totaling 1000 F<sub>3</sub> individuals.  
168 These individuals were grown out in the greenhouse, and flowering time was recorded. They  
169 were genotyped by Digital Genotyping as described above [37]. Two F<sub>3</sub> individuals that had

170 useful breakpoints with a heterozygous genotype on one side of the breakpoint were grown and  
171 self-pollinated to generate an additional round of HIFs ( $F_4$ ,  $n = 150$ ) that were planted in the  
172 spring of 2013 and analyzed as described above. No new breakpoints were identified in the  $F_4$   
173 generation, so this process was repeated again to generate  $F_5$  plants in the spring of 2014.

174

## 175 **Circadian gene expression analysis**

176 For the circadian gene expression analysis, 30-day-old plants were placed in a growth  
177 chamber set to 14 h days for the first 24 h and constant light for the second 24 h at 30°C. Plants  
178 were entrained for 3 d before beginning tissue collection. Leaf tissue was collected and pooled  
179 from 3 plants every 3 h for 48 h. The experiment was repeated three times for a total of three  
180 biological replicates. RNA was extracted from each sample using the Direct-Zol™ RNA  
181 Miniprep Kit (Zymo Research) according to the kit instructions. cDNA was synthesized using  
182 SuperScript III kit for qRT-PCR (Invitrogen) according to the kit instructions. Primers for  
183 sorghum flowering pathway genes were developed previously, and primer sequences are  
184 available in Murphy et al [21]. Primer sequences for  $Ma_2$  are available in S1 Table. Relative  
185 expression was determined using the comparative cycle threshold ( $C_t$ ) method. Raw  $C_t$  values for  
186 each sample were normalized to  $C_t$  values for the reference gene *SbUBC* (Sobic.001G526600).  
187 Reference gene stability was determined previously [43].  $\Delta\Delta C_t$  values were calculated relative to  
188 the sample with the highest expression (lowest  $C_t$  value). Relative expression values were  
189 calculated with the  $2^{-\Delta\Delta C_t}$  method [44]. Primer specificity was tested by dissociation curve  
190 analysis and gel electrophoresis of qRT-PCR products.

191



## 192 **Ma<sub>2</sub> phylogenetic analysis**

193 Protein sequences of the closest homologs of Ma<sub>2</sub> were identified using BLAST analysis.

194 Protein sequences were aligned using MUSCLE [45] and visualized using Jalview [46].

195 Evolutionary trees were inferred using the Neighbor-Joining method [47] in MEGA7 [48]. All

196 positions containing gaps and missing data were eliminated.

197

## 198 **Ma<sub>2</sub> DNA sequencing and whole genome sequence analysis**

199 Whole genome sequence reads of 52 sorghum genotypes including 100M and 80M were

200 obtained from Phytozome v12. Base quality score recalibration, INDEL realignment, duplicate

201 removal, joint variant calling, and variant quality score recalibration were performed using

202 GATK v3.3 with the RIG workflow [49]. Sobic.002G302700 was sequenced via Sanger

203 sequencing in the genotypes in Table 1 according to the BigDye Terminator Kit (Applied

204 Biosystems). Primers for template amplification and sequencing are provided in S1 Table.

205

## 206 **Results**

### 207 **Effects of Ma<sub>2</sub> alleles on flowering pathway gene expression**

208 The recessive *ma<sub>2</sub>*-allele in 80M (*Ma<sub>1</sub>ma<sub>2</sub>Ma<sub>3</sub>Ma<sub>4</sub>Ma<sub>5</sub>ma<sub>6</sub>*) was previously reported to

209 cause 80M to flower earlier than 100M (*Ma<sub>1</sub>Ma<sub>2</sub>Ma<sub>3</sub>Ma<sub>4</sub>Ma<sub>5</sub>ma<sub>6</sub>*) in long days [28]. To help

210 elucidate how *Ma<sub>2</sub>* modifies flowering time, we investigated the impact of *Ma<sub>2</sub>* alleles on the

211 expression of genes in sorghum's flowering time pathway. Gene expression was analyzed by

212 qRT-PCR using RNA isolated from 100M (*Ma<sub>2</sub>*) and 80M (*ma<sub>2</sub>*) leaves collected every 3 hours  
213 for one 14h light/10h dark cycle and a second 24-hour period of constant light.

214 *SbPRR37* is a central regulator of photoperiod sensitive flowering in sorghum that acts by  
215 repressing the expression of *SbCN* (*FT*-like) genes in LD [21]. *SbPRR37* expression in 100M and  
216 80M grown in long days peaked in the morning and again in the evening as previously observed  
217 [21] (Fig 1). The amplitude of both peaks of *SbPRR37* expression was reduced in 80M (*ma<sub>2</sub>*)  
218 compared to 100M (*Ma<sub>2</sub>*) (Fig 1A). *SbCO* also shows peaks of expression in the morning  
219 (dawn) and in the evening (~14h) [21] (Fig 5C). Analysis of *SbCO* expression in 100M and 80M  
220 showed that both peaks of *SbCO* expression were reduced in 80M compared to 100M (Fig 1B).

221

222 **Fig 1. Circadian expression of genes regulating flowering in *S. bicolor* in 100M and 80M**  
223 **under long days.**

224 (A) Expression of *SbPRR37* in 100M (solid black lines) and 80M (dashed red lines). The  
225 expression peaks of *SbPRR37* are reduced in 80M. This is consistent with earlier flowering in  
226 80M because *SbPRR37* represses the expression of the sorghum *FT*-like genes. (B) Expression of  
227 *SbCO* in 100M and 80M. Expression peaks of *SbCO* are also reduced in 80M. This is consistent  
228 with earlier flowering in 80M because under long days *SbCO* is a repressor of flowering. All  
229 expression values are normalized to *SbUBC* and are the mean of 3 biological replicates.

230

231 *SbCN8*, *SbCN12*, and *SbCN15* are homologs of *AtFT* that encode florigens in sorghum  
232 [22]. Expression of *SbCN8* and *SbCN12* increases when sorghum plants are shifted from LD to  
233 SD, whereas *SbCN15* shows minimal response to day length [21,26]. *SbPRR37* and *SbCO* are  
234 co-repressor of the expression of *SbCN8* and *SbCN12* in long days, therefore, the influence of  
235 *Ma<sub>2</sub>* alleles on *SbCN8/12/15* expression was investigated [21,27]. When plants were grown in  
236 long days, expression of *SbCN12* was ~10 fold higher in 80M compared to 100M consistent with  
237 earlier flowering in 80M (Fig 2).

238

239 **Fig 2. Expression of the *S. bicolor* FT-like genes *SbCN8*, *SbCN12*, and *SbCN15* in long days**  
240 **at the expected peak of expression.**

241 Expression of *SbCN* genes are all elevated in 80M, which is consistent with earlier flowering in  
242 that genotype. All expression values are normalized to *SbUBC* and are the mean of 3 biological  
243 replicates. Fold change was calculated as  $2^{-[Ct(100M)-Ct(80M)]}$ .

244

245 Previous studies showed that *SbGHD7* represses *SbEHD1* expression and that alleles of  
246 *SbGHD7* differentially affect *SbCN8* expression (>*SbCN12*) [26]. Analysis of *SbEHD1* and  
247 *SbGHD7* expression in 100M and 80M showed that *Ma2* alleles modify the expression of these  
248 genes only to a small extent (S1 Fig).

249 The timing of the two daily peaks of *SbPRR37* and *SbCO* expression in sorghum is  
250 regulated by the circadian clock [21,26]. Therefore, it was possible that *Ma2* modifies  
251 *SbPRR37/SbCO* expression by altering clock gene expression. However, expression of the clock  
252 genes *TOC1* and *LHY* was similar in 100M and 80M (S1 Fig). Taken together, these results show  
253 that *Ma2* is an activator of *SbPRR37* and *SbCO* expression in long days. Prior studies showed  
254 that co-expression of *SbPRR37* and *SbCO* in long days inhibits expression of *SbCN12* and floral  
255 initiation [27]. Later flowering in sorghum genotypes that are *Ma1Ma2* vs. *Ma1ma2* in long days  
256 is consistent with lower *SbCN12* expression in *Ma1Ma2* genotypes.

257

258 **Genetic analysis of *Ma2* and *Ma4***

259 An F<sub>2</sub> population derived from a cross of 100M (*Ma2*) and 80M (*ma2*) was generated to  
260 map the *Ma2* locus. Because 100M and 80M are nearly isogenic lines that differ at *Ma2*, only  
261 *Ma2* alleles were expected to affect flowering time in this population [28]. The F<sub>2</sub> population (n =  
262 ~1100) segregated for flowering time in a 3:1 ratio as expected. The parental lines and F<sub>2</sub>  
263 individuals were genotyped by Digital Genotyping (DG) which identifies single nucleotide  
264 polymorphism (SNP) markers in thousands of sequenced sites that distinguish the parents of a

265 population [37]. The near isogenic nature of the parental lines resulted in a very sparse genetic  
266 map that lacked coverage of large regions of the sorghum genome including all of the long arm  
267 of SBI02. In retrospect, no  $Ma_2$  QTL for flowering time was identified using this genetic map  
268 because the gene is located on the long arm of SBI02 (see below).

269 To overcome the limitations associated with the 80M/100M population, a second  
270 mapping population was created to identify the genetic locus associated with  $Ma_2$ . An  $F_2$   
271 population (n = 215) that would segregate for  $Ma_2$  and  $Ma_4$  was constructed by crossing Hegari  
272 ( $Ma_1Ma_2Ma_3ma_4Ma_5ma_6$ ) and 80M ( $Ma_1ma_2Ma_3Ma_4Ma_5ma_6$ ) [30,50]. The population was  
273 grown in a greenhouse under long day conditions and phenotyped for days to flowering. QTL for  
274 flowering time were identified on SBI02 and SBI10 (Fig 3). Recessive alleles of  $Ma_2$  and  $Ma_4$   
275 result in earlier flowering when plants are grown in long days. The Hegari haplotype across the  
276 QTL on SBI10 was associated with early flowering therefore this QTL corresponds to  $Ma_4$  (S3  
277 Fig). The 80M haplotype across the QTL on SBI02 was associated with early flowering therefore  
278 the QTL on SBI02 corresponds to  $Ma_2$ .

279

### 280 **Fig 3. Quantitative trait locus (QTL) map of flowering time in the Hegari/80M $F_2$** 281 **population.**

282 Two QTL were identified for variation in flowering time in the  $F_2$  population derived from  
283 Hegari ( $Ma_1Ma_2Ma_3ma_4$ ) and 80M ( $Ma_1ma_2Ma_3Ma_4$ ). This population was expected to segregate  
284 for  $Ma_2$  and  $Ma_4$ . Each recessive  $Ma$  allele causes earlier flowering. The QTL on LG10  
285 corresponds to  $Ma_4$  because  $F_2$  individuals carrying the Hegari allele contributed to accelerated  
286 flowering.  $F_2$  individuals carrying the 80M allele at the QTL on LG02 flowered earlier, so this  
287 QTL corresponds to  $Ma_2$ .

288

### 289 **Epistatic interactions between $Ma_2$ and $Ma_4$**

290 Previous studies indicated an epistatic interaction exists between  $Ma_2$  and  $Ma_4$  [28].

291 Therefore, Multiple QTL Mapping (MQM) analysis [51] was employed, using data from the

292 Hegari/80M F<sub>2</sub> population, to identify additional flowering time QTL and interactions amongst  
293 the QTL as previously described [52]. MQM analysis identified the QTL for flowering time on  
294 SBI02 and SBI10 and an additional QTL on SBI09. Additionally, an epistatic interaction was  
295 identified between *Ma*<sub>2</sub> and *Ma*<sub>4</sub> (pLOD = 42). Interaction plots showed that in a dominant *Ma*<sub>4</sub>  
296 background, a dominant allele at *Ma*<sub>2</sub> delays flowering, while in a recessive *Ma*<sub>4</sub> background,  
297 *Ma*<sub>2</sub> has a minimal impact on flowering time (Fig 4). The interaction between *Ma*<sub>2</sub> and *Ma*<sub>4</sub>  
298 identified by MQM analysis is consistent previous observations that in a recessive *ma*<sub>4</sub>  
299 background flowering is early regardless of allelic variation in *Ma*<sub>2</sub> [28].

300

#### 301 **Fig 4. Interaction plots for the Ma2 QTL and the Ma4 QTL**

302 There is a known interaction between *Ma*<sub>2</sub> (represented by marker c2\_68327634) and *Ma*<sub>4</sub>  
303 (represented by marker c10\_3607821). This interaction was identified by multiple QTL mapping  
304 (MQM). Dominant alleles of the *Ma* genes delay flowering. In a recessive *ma*<sub>4</sub> background (AA  
305 at c2\_68327634), the effect of *Ma*<sub>2</sub> on days to flowering is reduced. A represents the 80M allele  
306 and B represents the Hegari allele at each QTL. Reciprocal plots are shown.

307

#### 308 **Ma2 candidate gene identification**

309 The Hegari/80M F<sub>2</sub> population located *Ma*<sub>2</sub> on SBI02 between 67.3 Mbp to 69.1 Mbp  
310 (Fig 5). To further delimit the *Ma*<sub>2</sub> locus, six lines from the Hegari/80M population that were  
311 heterozygous across the *Ma*<sub>2</sub> QTL but fixed across the *Ma*<sub>4</sub> locus (*Ma*<sub>4</sub>*Ma*<sub>4</sub>) were selfed to create  
312 heterogeneous inbred families (HIFs) (n=1000 F<sub>3</sub> plants) [53]. Analysis of these HIFs narrowed  
313 the region encoding *Ma*<sub>2</sub> to ~600 kb (67.72 Mb-68.33 Mb) (Fig 5). Genotypes that were still  
314 heterozygous across the delimited locus were selfed and 100 F<sub>4</sub> plants were evaluated for  
315 differences in flowering time. This process narrowed the *Ma*<sub>2</sub> locus to a region spanning ~500 kb  
316 containing 76 genes (67.72Mb-68.22Mb) (Fig 5, S2 Table).

317

318 **Fig 5. Fine-mapping of the *Ma2* QTL.**

319 The *Ma2* QTL spans from 67.3 Mpb to 69.1 Mbp (light blue bar). Five F<sub>2</sub> individuals that were  
320 heterozygous across the *Ma2* QTL were self-pollinated to generate heterogeneous inbred families  
321 (HIFs) totaling 1000 F<sub>3</sub> individuals. Genotype and phenotype analysis of these HIFs narrowed  
322 the QTL region to ~600 kb (darker blue bar). Two additional rounds of fine-mapping narrowed  
323 the QTL region to ~500 kb (vertical dashed lines). This region contained 76 genes. The  
324 genotypes of relevant HIFs and the parents are shown to the left and their corresponding days to  
325 flowering are shown to the right. Blue regions correspond to the 80M genotype and red regions  
326 correspond to the Hegari genotype. Purple regions are heterozygous.  
327

328           The low rate of recombination across the *Ma2* locus led us to utilize whole genome  
329 sequencing in conjunction with fine mapping to identify a candidate gene for *Ma2*. Since 100M  
330 and 80M are near isogenic lines that have very few sequence differences along the long arm of  
331 SBI02 where the *Ma2* QTL is located, whole genome sequences (WGS) of 100M and 80M were  
332 generated in collaboration with JGI (sequences available at [www.phytozome.jgi.doe.gov](http://www.phytozome.jgi.doe.gov)). The  
333 genome sequences were scanned for polymorphisms within the 500 kb locus spanning *Ma2*. Only  
334 one T → A single nucleotide polymorphism (SNP) located in Sobic.002G302700 was identified  
335 that distinguished 100M and 80M within the region spanning the *Ma2* locus. The T → A  
336 mutation causes a Lys141\* change in the third exon, resulting a truncated protein. A 500 bp  
337 DNA sequence spanning the T to A polymorphism in Sobic.002G302700 was sequenced from  
338 80M and 100M to confirm the SNP identified by comparison of the whole genome sequences  
339 (Table 1). The T → A point mutation was present in 80M (*ma2*) whereas 100M (*Ma2*) encoded a  
340 functional version of Sobic.002G302700 that encodes a full length protein. Since this mutation  
341 was the only sequence variant between 100M and 80M in the fine-mapped locus,  
342 Sobic.002G302700 was identified as the best candidate gene for *Ma2*.

343           Sobic.002G302700 is annotated as a SET (Suppressor of variegation, Enhancer of Zeste,  
344 Trithorax) and MYND (Myeloid-Nervy-DEAF1) (SMYD) domain-containing protein. SMYD  
345 domain family proteins in humans have been found to methylate histone lysines and non-histone

346 targets and have roles in regulating chromatin state, transcription, signal transduction, and cell  
347 cycling [54,55]. The SET domain in SMYD-containing proteins is composed of two sub-  
348 domains that are divided by the MYND zinc-finger domain. The SET domain includes conserved  
349 sequences involved in methyltransferase activity including nine cysteine residues that are present  
350 in the protein encoded by Sobic.002G303700 (Fig 6) [56]. The MYND domain is involved in  
351 binding DNA and is enriched in cysteine and histidine residues [57]. Protein sequence alignment  
352 of Sobic.002G302700 homologs revealed that the SYMD protein candidate for *Ma2* is highly  
353 conserved across flowering plants (Fig 6).

354

355 **Fig 6. Alignment of Sobic.002G302700 with its closest homologs in several plant species.**  
356 Sobic.002G302700 is highly conserved across plant species. It is annotated as a Set and MYND  
357 (SMYD) protein. SMYD proteins have lysine methyltransferase activity. The MYND region is  
358 highlighted in red. The nine conserved Cys residues typical of SMYD proteins are indicated by  
359 asterisks.

360

361 To learn more about *Ma2* regulation, the expression of Sobic.002G302700 in 100M and  
362 80M was characterized during a 48h L:D/L:L cycle. *Ma2* showed a small increase in expression  
363 from morning to evening and somewhat higher expression in 100M compared to 80M during the  
364 evening (S1 Fig).

365

## 366 **Distribution of *Ma2* alleles in the sorghum germplasm**

367 Recessive *ma2* was originally found in the Milo background and used to construct Double  
368 Dwarf Yellow Milo (*Ma1ma2ma3Ma4Ma5ma6*) [28]. Double Dwarf Yellow Milo was crossed to  
369 Early White Milo (*ma1Ma2Ma3Ma4Ma5ma6*) and the progeny selected to create 100M, 80M and  
370 the other Milo maturity standards [1,28,58]. Several of the Milo maturity standards were  
371 recorded as recessive *Ma2* (80M, 60M, SM80, SM60, 44M, 38M) and others as *Ma2* dominant



372 (100M, 90M, SM100, SM90, 52/58M). In order to confirm the  $Ma_2$  genotype of the maturity  
373 standards, the 500 bp sequence spanning the Lys141\* mutation in Sobic.002G302700 was  
374 obtained from most of these genotypes (Table 1). Kalo was also identified as carrying a recessive  
375 allele of  $Ma_2$ . Kalo was derived from a cross of Dwarf Yellow Milo ( $ma_2$ ), Pink Kafir ( $Ma_2$ ),  
376 and CI432 ( $Ma_2$ ), therefore it was concluded that DYM is the likely source of recessive  $ma_2$  [28].  
377 Sequence analysis showed that the genotypes previously identified as  $ma_2$  including Kalo, 80M,  
378 SM80, 60M, 44M, 38M, and 58M carry the recessive mutation in Sobic.002G302700 identified  
379 in 80M. 100M, SM100, and Hegari that were identified as  $Ma_2$ , did not contain the mutated  
380 version of Sobic.002G302700 (Table 1). Additionally, sequences of  $Ma_2$  from 52 sorghum  
381 genotypes with publicly available genome sequences were compared [40]. Sobic.002G302700  
382 was predicted to encode functional proteins in all except one of these sorghum genotypes. A  
383 possible second recessive  $Ma_2$  allele was found in IS3614-2 corresponding to an M83T missense  
384 mutation that was predicted to be deleterious by PROVEAN [59].

385

386 **Table 1. Sequence variants of Sobic.002G203700 and their predicted effect on protein**  
387 **function**

| Genotype | Historical $Ma_2$ allele | Sequence variant | Effect on protein function |
|----------|--------------------------|------------------|----------------------------|
| 100M     | $Ma_2$                   | -                | -                          |
| SM100    | $Ma_2$                   | -                | -                          |
| SM90     | $Ma_2$                   | -                | -                          |
| Hegari   | $Ma_2$                   | -                | -                          |
| 80M      | $ma_2$                   | L141*            | Deleterious                |
| SM80     | $ma_2$                   | L141*            | Deleterious                |
| 60M      | $ma_2$                   | L141*            | Deleterious                |
| 44M      | $ma_2$                   | L141*            | Deleterious                |
| 38M      | $ma_2$                   | L141*            | Deleterious                |
| 58M      | $ma_2$                   | L141*            | Deleterious                |
| Kalo     | $ma_2$                   | L141*            | Deleterious                |
| IS3614-2 | -                        | M83T             | Deleterious                |

\*Sequenced by Sanger sequencing

388

389



## 390 Discussion

391 Sorghum is a facultative short day plant. In photoperiod sensitive sorghum genotypes,  
392 following the vegetative juvenile phase, day length has the greatest impact on flowering time  
393 under normal growing conditions. The development of early flowering grain sorghum adapted to  
394 temperate regions of the US was based on the selection of mutations in numerous genes that  
395 reduced photoperiod sensitivity. Genetic analysis of the loci and genes containing these  
396 mutations beginning in the 1940's [50,58] identified six *Maturity* loci ( $Ma_1$ - $Ma_6$ ) that resulted in  
397 earlier flowering time when plants were grown in long days. Recessive alleles at each of the six  
398 *Ma* loci reduces photoperiod sensitivity [30,31,58]. Molecular identification of the genes  
399 corresponding to  $Ma_1$ ,  $Ma_3$ ,  $Ma_5$  and  $Ma_6$  and other genes in the sorghum flowering time  
400 pathway (i.e., *SbCO*, *SbEHD1*, *SbCN8/12*) and an understanding of their regulation by  
401 photoperiod and the circadian clock led to the model of the flowering time pathway shown in  
402 Figure 7 [60]. The current study showed that  $Ma_2$  represses flowering in long days by increasing  
403 the expression of *SbPRR37* ( $Ma_1$ ) and *SbCO*. The study also located QTL for  $Ma_2$  and  $Ma_4$ ,  
404 confirmed an epistatic interaction between  $Ma_2$  and  $Ma_4$ , and identified a candidate gene for  
405  $Ma_2$ .

406

### 407 **Fig 7. A model of the flowering time regulatory pathway in *S. bicolor*.**

408  $Ma_2$  and  $Ma_4$  work codependently to enhance the expression of *SbPRR37* and *SbCO*. In LD,  
409 *SbPRR37* and *SbCO* in turn repress the expression of the *SbCN* genes, especially *SbCN12*, to  
410 repress the floral transition.

411

412 The recessive  $ma_2$  allele characterized in this study arose in a highly photoperiod  
413 sensitive Milo genotype that was introduced into the US in the late 1800's and then selected for  
414 early flowering to enhance grain production. Quinby and Karper [29] created near isogenic Milo

415 maturity genotypes with allelic variation at specific *Ma* loci to facilitate genetic and  
416 physiological analysis of flowering time regulation. In the current study, we utilized two of these  
417 maturity genotypes, 100M (*Ma*<sub>1</sub>***Ma***<sub>2</sub>*Ma*<sub>3</sub>*Ma*<sub>4</sub>*Ma*<sub>5</sub>*ma*<sub>6</sub>) and 80M (*Ma*<sub>1</sub>*ma*<sub>2</sub>*Ma*<sub>3</sub>*Ma*<sub>4</sub>*Ma*<sub>5</sub>*ma*<sub>6</sub>), to  
418 characterize how allelic variation in *Ma*<sub>2</sub> affects the expression of genes in the sorghum  
419 photoperiod regulated flowering time pathway (Fig 7). This analysis showed that mutation of  
420 *ma*<sub>2</sub> (80M) significantly reduced the amplitude of the morning and evening peaks of *SbPRR37*  
421 and *SbCO* expression compared to 100M (*Ma*<sub>2</sub>) without altering the timing of their expression.  
422 In addition, the expression of *SbCN12* (*FT*-like) increased 8-fold in leaves of 80M compared to  
423 100M consistent with earlier flowering in 80M. In contrast, expression of clock genes (*TOC1*,  
424 *LHY*) and other genes (i.e., *GHD7*, *EHD1*) in the photoperiod regulated flowering time pathway  
425 were modified to only a small extent by allelic variation in *Ma*<sub>2</sub>. Based on these results, we  
426 tentatively place *Ma*<sub>2</sub> in the flowering time pathway downstream of day length sensing  
427 phytochromes and circadian clock regulation and identify *Ma*<sub>2</sub> as a factor that enhances  
428 *SbPRR37* and *SbCO* expression (Fig 7).

429         The differential increase in *SbCN12* expression in 80M (vs. 100M) is consistent with  
430 differential inhibition of *SbCN12* expression in long days by the concerted action of *SbPRR37*  
431 and *SbCO* which has been previously shown to inhibit *SbCN12* expression [27]. Prior studies  
432 showed that 100M (*Ma*<sub>2</sub>) flowers later than 80M (*ma*<sub>2</sub>) in long days [28]. The impact of *Ma*<sub>2</sub>  
433 alleles on the expression of *SbPRR37* and *SbCO* is consistent with the effect of these alleles on  
434 flowering time in long days. Genetic studies showed that floral repression mediated by *SbPRR37*  
435 requires *SbCO* as a co-repressor [27]. Therefore, enhanced expression of both *SbPRR37* (*Ma*<sub>1</sub>)  
436 and *SbCO* by *Ma*<sub>2</sub> in *Ma*<sub>1</sub>*Ma*<sub>2</sub> genotypes in long days is consistent with delayed flowering under  
437 these conditions relative to genotypes such as 80M that are *Ma*<sub>1</sub>*ma*<sub>2</sub>. Molecular genetic studies

438 also showed that SbCO is an activator of *SbCN12* expression and flowering in *ma<sub>1</sub>* genetic  
439 backgrounds [27]. This is consistent with the observation that *ma<sub>1</sub>Ma<sub>2</sub>* genotypes flower earlier  
440 than *ma<sub>1</sub>ma<sub>2</sub>* genotypes when grown in long days [28].

441

## 442 **Interactions between *Ma<sub>2</sub>* and *Ma<sub>4</sub>***

443 Multiple QTL (MQM) analysis of results from a population derived from Hegari/80M  
444 identified an interaction between *Ma<sub>2</sub>* and *Ma<sub>4</sub>* as well as one additional flowering QTL on  
445 SBI09. Flowering time QTL on SBI09 have been identified in other mapping populations, but  
446 the gene(s) involved have not been identified [33,34]. The interaction between *Ma<sub>2</sub>* and *Ma<sub>4</sub>*  
447 confirmed previous observations that recessive *ma<sub>4</sub>* causes accelerated flowering in long days in  
448 *Ma<sub>1</sub>Ma<sub>2</sub>* genotypes [28]. Interestingly, the influence of *Ma<sub>2</sub>* and *Ma<sub>4</sub>* alleles on flowering time is  
449 affected by temperature [28,61]. The influence of temperature on flowering time pathway gene  
450 expression in 80M and 100M in the current study was minimized by growing plants at constant  
451 30C. However, analysis of the temperature dependence of *Ma<sub>2</sub>* and *Ma<sub>4</sub>* on flowering time may  
452 help elucidate interactions between photoperiod and flowering time that have been previously  
453 documented [28,62]. Positional cloning of *Ma<sub>4</sub>* is underway to better understand the molecular  
454 basis of *Ma<sub>2</sub>* and *Ma<sub>4</sub>* interaction and their impact on flowering time.

455

## 456 **Identification of a candidate gene for *Ma<sub>2</sub>***

457 A mapping population derived from Hegari/80M that segregated for *Ma<sub>2</sub>* and *Ma<sub>4</sub>*  
458 enabled localization of the corresponding flowering time QTL in the sorghum genome (SBI02,  
459 *Ma<sub>2</sub>*; SBI10, *Ma<sub>4</sub>*). The *Ma<sub>2</sub>* QTL on SBI02 was fine-mapped using heterozygous inbred families

460 (HIFs) from Hegari/80M. Several rounds of fine-mapping delimited the QTL to a ~500kb region  
461 containing 76 genes. Low recombination rates in this region of SBI02 made it difficult to delimit  
462 the QTL further using break point analysis therefore comparison of genome sequences from 80M  
463 and 100M was used to help identify a candidate gene for *Ma2*. The recessive *ma2* allele present  
464 in 80M arose in a Milo genotype similar to 100M [28] and genetic analysis of 100M and 80M  
465 showed that these near isogenic genotypes lacked DNA markers on the long arm of SBI02 where  
466 *Ma2* is located. Indeed, a scan of the whole genome sequences of 100M and 80M identified only  
467 a single T to A mutation in the 500 kb region spanning the fine-mapped *Ma2* locus. This  
468 mutation caused a Lys141\* change in the third exon of Sobic.002G302700 resulting in protein  
469 truncation. Based on this information Sobic.002G302700 was tentatively identified as the best  
470 candidate gene for *Ma2*.

471         Sobic.002G302700 encodes a SET (Suppressor of variegation, Enhancer of Zeste,  
472 Trithorax) and MYND (Myeloid-Nervy-DEAF1) (SMYD) domain containing protein. In  
473 humans, SMYD proteins act as lysine methyltransferases, and the SET domain is critical to this  
474 activity. Therefore, *Ma2* could be altering the expression of *SbPRR37* and *SbCO* by modifying  
475 histones associated with these genes. The identification of this SMYD family protein's  
476 involvement in flowering in sorghum as well as the identification of highly conserved homologs  
477 in other plant species suggests that *Ma2* may correspond to a novel regulator of sorghum  
478 flowering. While a role for SYMD-proteins (lysine methyltransferases) as regulators of  
479 flowering time has not been previously reported, genes encoding histone lysine demethylases  
480 (i.e., JM30/32) have been found to regulate temperature modulated flowering time in  
481 Arabidopsis [63].

482 J.R. Quinby [50] identified only one recessive allele of  $Ma_2$  among the sorghum  
483 genotypes used in the Texas sorghum breeding program. The maturity standard lines including  
484 80M that are recessive for  $ma_2$  and the genotype Kalo were reported to be derived from the same  
485 recessive  $ma_2$  Milo genotype [28]. To confirm this,  $Ma_2$  alleles in the relevant maturity standards  
486 and Kalo were sequenced confirming that all of these  $ma_2$  genotypes carried the same mutation  
487 identified in 80M (Table 1). Among the 52 sorghum genotypes with available whole genome  
488 sequences, only 80M carried the mutation in  $Ma_2$  [40]. One possible additional allele of  $ma_2$  was  
489 identified in IS36214-2, which contained a M83T missense mutation that was predicted to be  
490 deleterious to protein function by PROVEAN [59].

491 In conclusion, we have shown that  $Ma_2$  represses flowering in long days by promoting  
492 the expression of the floral repressor  $SbPRR37$  and  $SbCO$ , a gene that acts as a co-repressor in  
493 long days (Fig 7). Sobic.002G302700 was identified as the best candidate for the sorghum  
494 *Maturity* locus  $Ma_2$  although further validation such as targeted mutation of Sobic.002G302700  
495 in a  $Ma_1Ma_2$  sorghum genotype or complementation of  $Ma_1ma_2$  genotypes will be required to  
496 confirm this gene assignment. The identification of this gene and its interaction with  $Ma_4$  begins  
497 to elucidate a new element of the photoperiod flowering regulation pathway in sorghum.  
498

## 499 **Acknowledgements**

500 This research was supported by the Perry Adkisson Chair in Agricultural Biology and by the  
501 Agriculture and Food Research Initiative Competitive Grant 2016-67013-24617 from the USDA  
502 National Institute of Food and Agriculture. The authors would like to thank Dr. Daryl Morishige  
503 for his assistance in performing the Hegari/80M cross as well as Robin Poncik for her assistance  
504 in recording flowering dates.  
505

## 506 References

- 507
- 508 1. Quinby JR. The Genetic Control of Flowering and Growth in Sorghum. *Adv Agron.*  
509 1974;25:125–62.
  - 510 2. Mace ES, Tai S, Gilding EK, Li Y, Prentis PJ, Bian L, et al. Whole-genome sequencing  
511 reveals untapped genetic potential in Africa’s indigenous cereal crop sorghum. *Nat*  
512 *Commun.* 2013;4:337–42.
  - 513 3. Mullet J, Morishige D, McCormick R, Truong S, Hilley J, McKinley B, et al. Energy  
514 sorghum--a genetic model for the design of C4 grass bioenergy crops. *J Exp Bot.*  
515 2014;65(13):3479–89.
  - 516 4. Boyles RE, Brenton ZW, Kresovich S. Genetic and Genomic Resources of Sorghum to  
517 Connect Genotype with Phenotype in Contrasting Environments. *Plant J.* 2018;19–39.
  - 518 5. Olson SN, Ritter K, Rooney W, Kemanian A, McCarl BA, Zhang Y, et al. High biomass  
519 yield energy sorghum: developing a genetic model for C4 grass bioenergy crops. *Biofuels,*  
520 *Bioprod Biorefining.* 2012;6(3):246–56.
  - 521 6. Burks PS, Felderhoff TJ, Viator HP, Rooney WL. The influence of hybrid maturity and  
522 planting date on sweet sorghum productivity during a harvest season. *Agron J.*  
523 2013;105(1):263–7.
  - 524 7. Teetor VH, Duclos D V., Wittenberg ET, Young KM, Chawhuaymak J, Riley MR, et al.  
525 Effects of planting date on sugar and ethanol yield of sweet sorghum grown in Arizona.  
526 *Ind Crops Prod.* 2011;34(2):1293–300.
  - 527 8. Rooney WL, Blumenthal J, Bean B, Mullet JE. Designing sorghum as a dedicated  
528 bioenergy feedstock. *Biofuels, Bioprod Biorefining.* 2007;1:147–57.
  - 529 9. Song YH, Ito S, Imaizumi T. Flowering time regulation: Photoperiod- and temperature-  
530 sensing in leaves. *Trends Plant Sci.* Elsevier Ltd; 2013;18(10):575–83.
  - 531 10. Tsuji H, Taoka KI, Shimamoto K. Florigen in rice: Complex gene network for florigen  
532 transcription, florigen activation complex, and multiple functions. *Curr Opin Plant Biol.*  
533 Elsevier Ltd; 2013;16:228–35.
  - 534 11. Sanchez SE, Kay SA. The plant circadian clock: from a simple timekeeper to a complex  
535 developmental manager. *Cold Spring Harb Perspect Biol.* 2016;a027748.
  - 536 12. Corbesier L, Vincent C, Jang S, Fornara F, Fan Q, Searle I, et al. Long-Distance Signaling  
537 in Floral Induction of Arabidopsis. *Science (80- ).* 2007;316:1030–3.
  - 538 13. Abe M, Kobayashi Y, Yamamoto S, Daimon Y, Yamaguchi A, Ikeda Y, et al. FD, a bZIP  
539 protein mediating signals from the floral pathway integrator FT at the shoot apex. *Science*  
540 *(80- ).* 2005;309:1052–6.
  - 541 14. Schaffer R, Ramsay N, Samach A, Corden S, Putterill J, Carré IA, et al. The late  
542 elongated hypocotyl mutation of Arabidopsis disrupts circadian rhythms and the  
543 photoperiodic control of flowering. *Cell.* 1998;93(7):1219–29.
  - 544 15. Millar AJ, Carre IA, Strayer CA, Chua NH, Kay SA. Circadian clock mutants in  
545 Arabidopsis identified by luciferase imaging. *Science (80- ).* 1995;267(5201):1161 LP-  
546 1163.
  - 547 16. Park DH, Somers DE, Kim YS, Choy YH, Lim HK, Soh MS, et al. Control of circadian  
548 rhythms and photoperiodic flowering by the Arabidopsis GIGANTEA gene. *Science*  
549 *(80- ).* 1999;285(5433):1579–82.
  - 550 17. Suárez-López P, Wheatley K, Robson F, Onouchi H, Valverde F, Coupland G.  
551 CONSTANS mediates between the circadian clock and the control of flowering in



- 552 Arabidopsis. *Nature*. 2001;410(6832):1116.
- 553 18. Turnbull C. Long-distance regulation of flowering time. *J Exp Bot*. 2011;62(13):4399–
- 554 413.
- 555 19. Dong Z, Danilevskaya O, Abadie T, Messina C, Coles N, Cooper M. A gene regulatory
- 556 network model for Floral transition of the shoot apex in maize and its dynamic modeling.
- 557 *PLoS One*. 2012;7(8).
- 558 20. Tamaki S, Matsuo S, Wong HL, Yokoi S, Shimamoto K. Hd3a Protein Is a Mobile
- 559 Flowering Signal in Rice. *Science* (80- ). 2007;316:1033–6.
- 560 21. Murphy RL, Klein RR, Morishige DT, Brady JA, Rooney WL, Miller FR, et al.
- 561 Coincident light and clock regulation of controls photoperiodic flowering in sorghum.
- 562 *Proc Natl Acad Sci U S A*. 2011;37:1–6.
- 563 22. Wolabu TW, Zhang F, Niu L, Kalve S, Bhatnagar-Mathur P, Muszynski MG, et al. Three
- 564 FLOWERING LOCUS T-like genes function as potential florigens and mediate
- 565 photoperiod response in sorghum. *New Phytol*. 2016;210:946–59.
- 566 23. Yang S, Murphy RL, Morishige DT, Klein PE, Rooney WL, Mullet JE. Sorghum
- 567 Phytochrome B Inhibits Flowering in Long Days by Activating Expression of SbPRR37
- 568 and SbGHD7, Repressors of SbEHD1, SbCN8 and SbCN12. *PLoS One*.
- 569 2014;9(8):e105352.
- 570 24. Cho L-H, Yoon J, Pasriga R, An G. Homodimerization of Ehd1 is required to induce
- 571 flowering in rice. *Plant Physiol*. 2016;170:2159–71.
- 572 25. Xue W, Xing Y, Weng X, Zhao Y, Tang W, Wang L, et al. Natural variation in Ghd7 is an
- 573 important regulator of heading date and yield potential in rice. *Nat Genet*. 2008;40:761.
- 574 26. Murphy RL, Morishige DT, Brady J a., Rooney WL, Yang S, Klein PE, et al. Ghd7 (Ma6)
- 575 Represses Sorghum Flowering in Long Days: Alleles Enhance Biomass Accumulation and
- 576 Grain Production. *Plant Genome*. 2014;7(2):1–10.
- 577 27. Yang S, Weers BD, Morishige DT, Mullet JE. CONSTANS is a photoperiod regulated
- 578 activator of flowering in sorghum. *BMC Plant Biol*. 2014;14:148.
- 579 28. Quinby JR. The Maturity Genes of Sorghum. *Adv Agron*. 1967;19:267–305.
- 580 29. Karper RE, Quinby JR. The history and evolution of milo in the United States. *Agron J*.
- 581 1946;38(5):441–53.
- 582 30. Quinby JR. Fourth maturity gene locus in sorghum. *Crop Sci*. 1966;(6):516–8.
- 583 31. Rooney WL, Aydin S. Genetic Control of a Photoperiod-Sensitive Response in Sorghum
- 584 bicolor (L.) Moench. *Crop Sci*. 1999;39:397–400.
- 585 32. Hart GE, Schertz KF, Peng Y, Syed NH. Genetic mapping of Sorghum bicolor (L.)
- 586 Moench QTLs that control variation in tillering and other morphological characters. *Theor*
- 587 *Appl Genet*. 2001;103(8):1232–42.
- 588 33. Higgins RH, Thurber CS, Assaranurak I, Brown PJ. Multiparental mapping of plant height
- 589 and flowering time QTL in partially isogenic sorghum families. *G3*. 2014;4:1593–602.
- 590 34. Zhao J, Mantilla Perez MB, Hu J, Salas Fernandez MG. Genome-Wide Association Study
- 591 for Nine Plant Architecture Traits in Sorghum. *Plant Genome*. 2016;9(2):1–14.
- 592 35. Lin Y, Schertz KF, Patemon AH. Comparative Analysis of QTLs Affecting Plant Height
- 593 and Maturity Across the Poaceae,. 1995. 1995;141:391–411.
- 594 36. Childs KL, Miller FR, Cordonnier-Pratt MM, Pratt LH, Morgan PW, Mullet JE. The
- 595 sorghum photoperiod sensitivity gene, Ma3, encodes a phytochrome B. *Plant Physiol*.
- 596 1997;113:611–9.
- 597 37. Morishige DT, Klein PE, Hilley JL, Sahraeian SME, Sharma A, Mullet JE. Digital



- 598 genotyping of sorghum - a diverse plant species with a large repeat-rich genome. *BMC*  
599 *Genomics*. 2013;14:1–19.
- 600 38. Lander Eric S., Green Philip, Abrahamson Jeff, Barlow Aaron, Daly Mark J., Lincoln  
601 Stephen E., et al. MAPMAKER: An interactive computer package for constructing  
602 primary genetic linkage maps of experimental and natural populations. *Genomics*.  
603 1987;1(2):174–81.
- 604 39. Wang S, Basten CJ, Zeng ZB. *Windows QTL Cartographer 2.5*. Raleigh, NC: Department  
605 of Statistics, North Carolina State University; 2012.
- 606 40. McCormick RF, Truong SK, Sreedasyam A, Jenkins J, Shu S, Sims D, et al. The Sorghum  
607 bicolor reference genome: improved assembly, gene annotations, a transcriptome atlas,  
608 and signatures of genome organization. *Plant J*. 2018;93(2):338–54.
- 609 41. Manichaikul A, Moon JY, Sen S, Yandell BS, Broman KW. A model selection approach  
610 for the identification of quantitative trait loci in experimental crosses, allowing epistasis.  
611 *Genetics*. 2009;181(3):1077–86.
- 612 42. Broman KW, Wu H, Sen S, Churchill GA. R/qtl: QTL mapping in experimental crosses.  
613 *Bioinformatics*. 2003;19(7):889–90.
- 614 43. Casto AL, McKinley BA, Yu KMJ, Rooney WL, Mullet JE. Sorghum stem aerenchyma  
615 formation is regulated by SbNAC\_D during internode development. *Plant Direct*.  
616 2018;2(11):e00085.
- 617 44. Livak KJ, Schmittgen TD. Analysis of Relative Gene Expression Data Using Real-Time  
618 Quantitative PCR and the 2- $\Delta\Delta$ Ct Method. *Methods*. 2001;25(4):402–8.
- 619 45. Edgar RC. MUSCLE: multiple sequence alignment with high accuracy and high  
620 throughput. *Nucleic Acids Res. England*; 2004;32(5):1792–7.
- 621 46. Waterhouse AM, Procter JB, Martin DMA, Clamp M, Barton GJ. Jalview Version 2--a  
622 multiple sequence alignment editor and analysis workbench. *Bioinformatics*.  
623 2009;25(9):1189–91.
- 624 47. Saitou N, Nei M. The neighbor-joining method: a new method for reconstructing  
625 phylogenetic trees. *Mol Biol Evol*. 1987;4(4):406–25.
- 626 48. Kumar S, Stecher G, Tamura K. MEGA7: Molecular Evolutionary Genetics Analysis  
627 Version 7.0 for Bigger Datasets. *Mol Biol Evol*. 2016;33(7):1870–4.
- 628 49. McCormick RF, Truong SK, Mullet JE. RIG: Recalibration and Interrelation of Genomic  
629 Sequence Data with the GATK. *G3 (Bethesda)*. 2015;5(4):655–65.
- 630 50. Quinby JR, Karper R. The inheritance of three genes that influence time of floral initiation  
631 and maturity date in Milo. *J Am Soc Agron*. 1945;(901):916–36.
- 632 51. Arends D, Prins P, Jansen RC, Broman KW. R/qtl: high-throughput multiple QTL  
633 mapping. *Bioinformatics*. 2010;26(23):2990–2.
- 634 52. Truong SK, McCormick RF, Rooney WL, Mullet JE. Harnessing genetic variation in leaf  
635 angle to increase productivity of sorghum bicolor. *Genetics*. 2015;201(3):1229–38.
- 636 53. Tuinstra MR, Ejeta G, Goldsbrough PB. Heterogeneous inbred family (HIF) analysis: A  
637 method for developing near-isogenic lines that differ at quantitative trait loci. *Theor Appl*  
638 *Genet*. 1997;95(5–6):1005–11.
- 639 54. Xu S, Zhong C, Zhang T, Ding J. Structure of human lysine methyltransferase Smyd2  
640 reveals insights into the substrate divergence in Smyd proteins. *J Mol Cell Biol*.  
641 2011;3(5):293–300.
- 642 55. Spellmon N, Holcomb J, Trescott L, Sirinupong N, Yang Z. Structure and function of SET  
643 and MYND domain-containing proteins. *Int J Mol Sci*. 2015;16(1):1406–28.

- 644 56. Min J, Zhang X, Cheng X, Grewal SIS, Xu RM. Structure of the SET domain histone  
645 lysine methyltransferase Clr4. *Nat Struct Biol.* 2002;9(11):828–32.
- 646 57. Gross CT, McGinnis W. DEAF-1, a novel protein that binds an essential region in a  
647 Deformed response element. *EMBO J.* 1996;15(8):1961–70.
- 648 58. Quinby JR, Karper RE. Effect of Different Alleles on the Growth of Sorghum Hybrids.  
649 1948;255–9.
- 650 59. Choi Y, Sims GE, Murphy S, Miller JR, Chan AP. Predicting the Functional Effect of  
651 Amino Acid Substitutions and Indels. *PLoS One.* 2012;7(10):e46688.
- 652 60. Mullet JE. High-Biomass C4 Grasses – Filling the Yield Gap. *Plant Sci. Elsevier;*  
653 2017;261:10–7.
- 654 61. Major DJ, Rood SB, Miller FR. Temperature and Photoperiod Effects Mediated by the  
655 Sorghum Maturity Genes. *Crop Sci.* 1990;30(2):305–10.
- 656 62. Tarumoto I. Thermo-sensitivity and photoperiod sensitivity genes controlling heading  
657 time and flower bud initiation in Sorghum, *Sorghum bicolor* Moench. *Japan Agric Res Q.*  
658 2011;45(1):69–76.
- 659 63. Gan ES, Xu Y, Wong JY, Geraldine Goh J, Sun B, Wee WY, et al. Jumonji demethylases  
660 moderate precocious flowering at elevated temperature via regulation of FLC in  
661 Arabidopsis. *Nat Commun.* 2014;5:1–13.
- 662

## 663 **Supporting information**

664

### 665 **S1 Fig. Circadian expression of *Sobic.002G302700* in 100M and 80M**

666 The expression of *Sobic.002G302700* does not cycle diurnally in 100M (solid black line) or 80M  
667 (dashed red line). There was no difference in expression between 100M and 80M in the first day.

668 Expression was slightly elevated in 100M compared to 80M during the night and through the  
669 following morning.

670

### 671 **S2 Fig. Circadian expression of *SbTOC1*, *SbLHY*, *SbGhd7*, and *SbEhd1***

672 There were no consistent differences in expression of (A) *SbTOC1*, (B) *SbLHY*, (C) *SbGhd7*, and  
673 (D) *SbEhd1* between 100M (solid black line) and 80M (dashed red line).

674

### 675 **S3 Fig. Genotype x phenotype plots for the QTL on SBI02 and SBI10**

676 Recessive alleles of *Maturity* genes contribute to earlier flowering. 80M (AA) is recessive for  
677 *ma<sub>2</sub>*, while Hegari (BB) is dominant. Individuals genotyped AA for the QTL on SBI02  
678 (represented by marker c2\_68327634) flowered ~100 d earlier than those genotyped BB. 80M is  
679 dominant for *Ma<sub>4</sub>*, and individuals genotyped AA at the QTL on SBI10 (represented by marker  
680 c10\_3607821) flowered ~100 d earlier than those genotyped BB.

681

### 682 **S1 Table. *Ma<sub>2</sub>* (*Sobic.002G302700*) sequencing and qPCR primers**

### 683 **S2 Table. Genes in the fine-mapped *Ma<sub>2</sub>* QTL region**

684

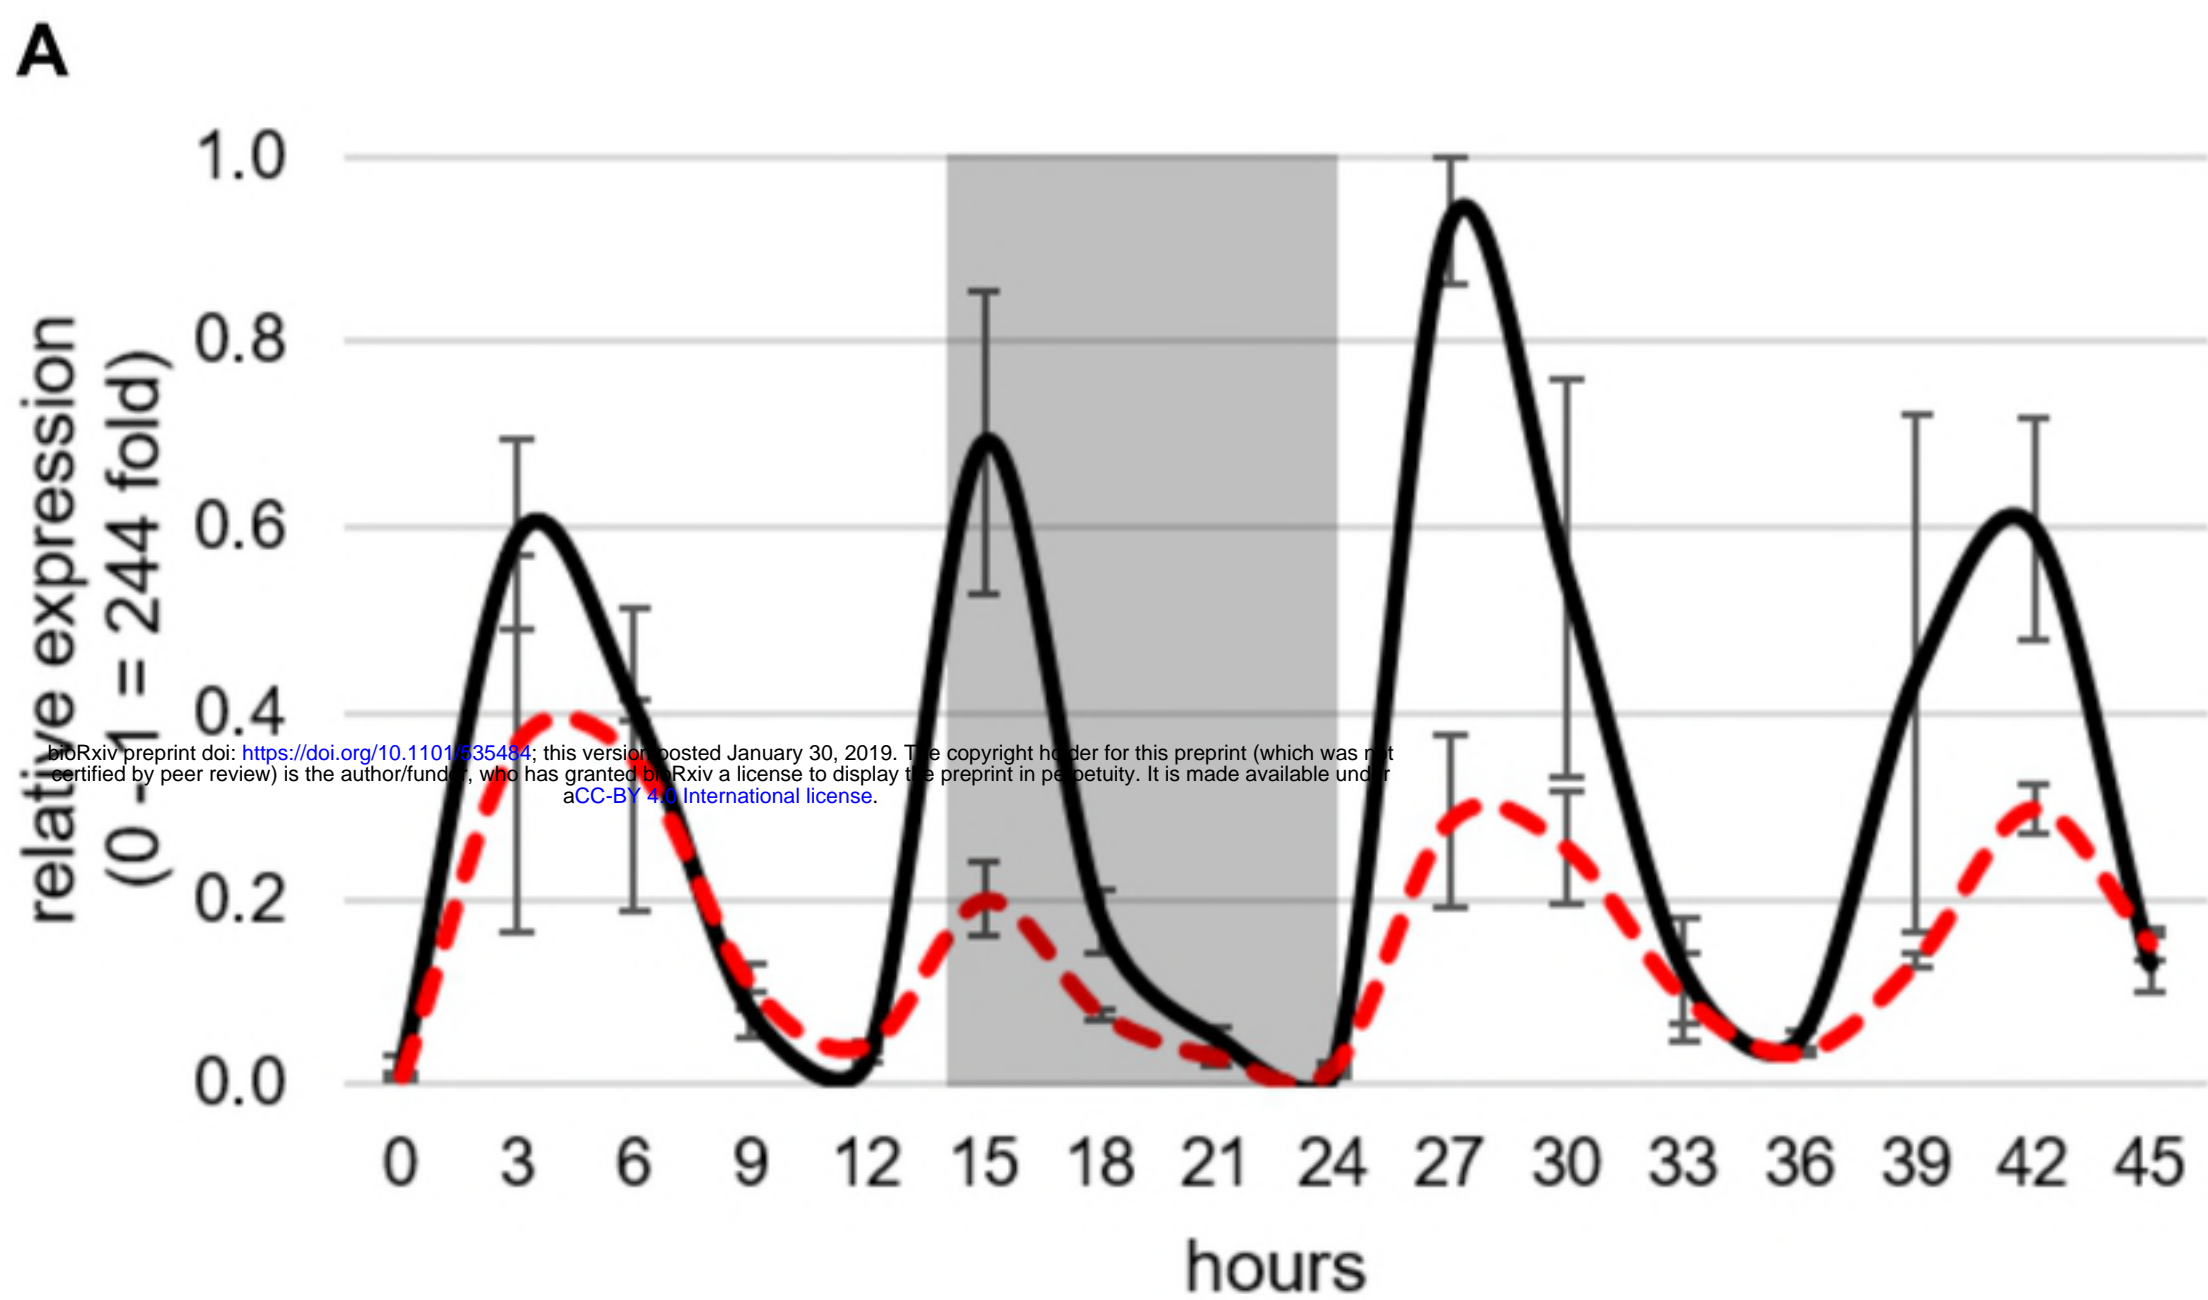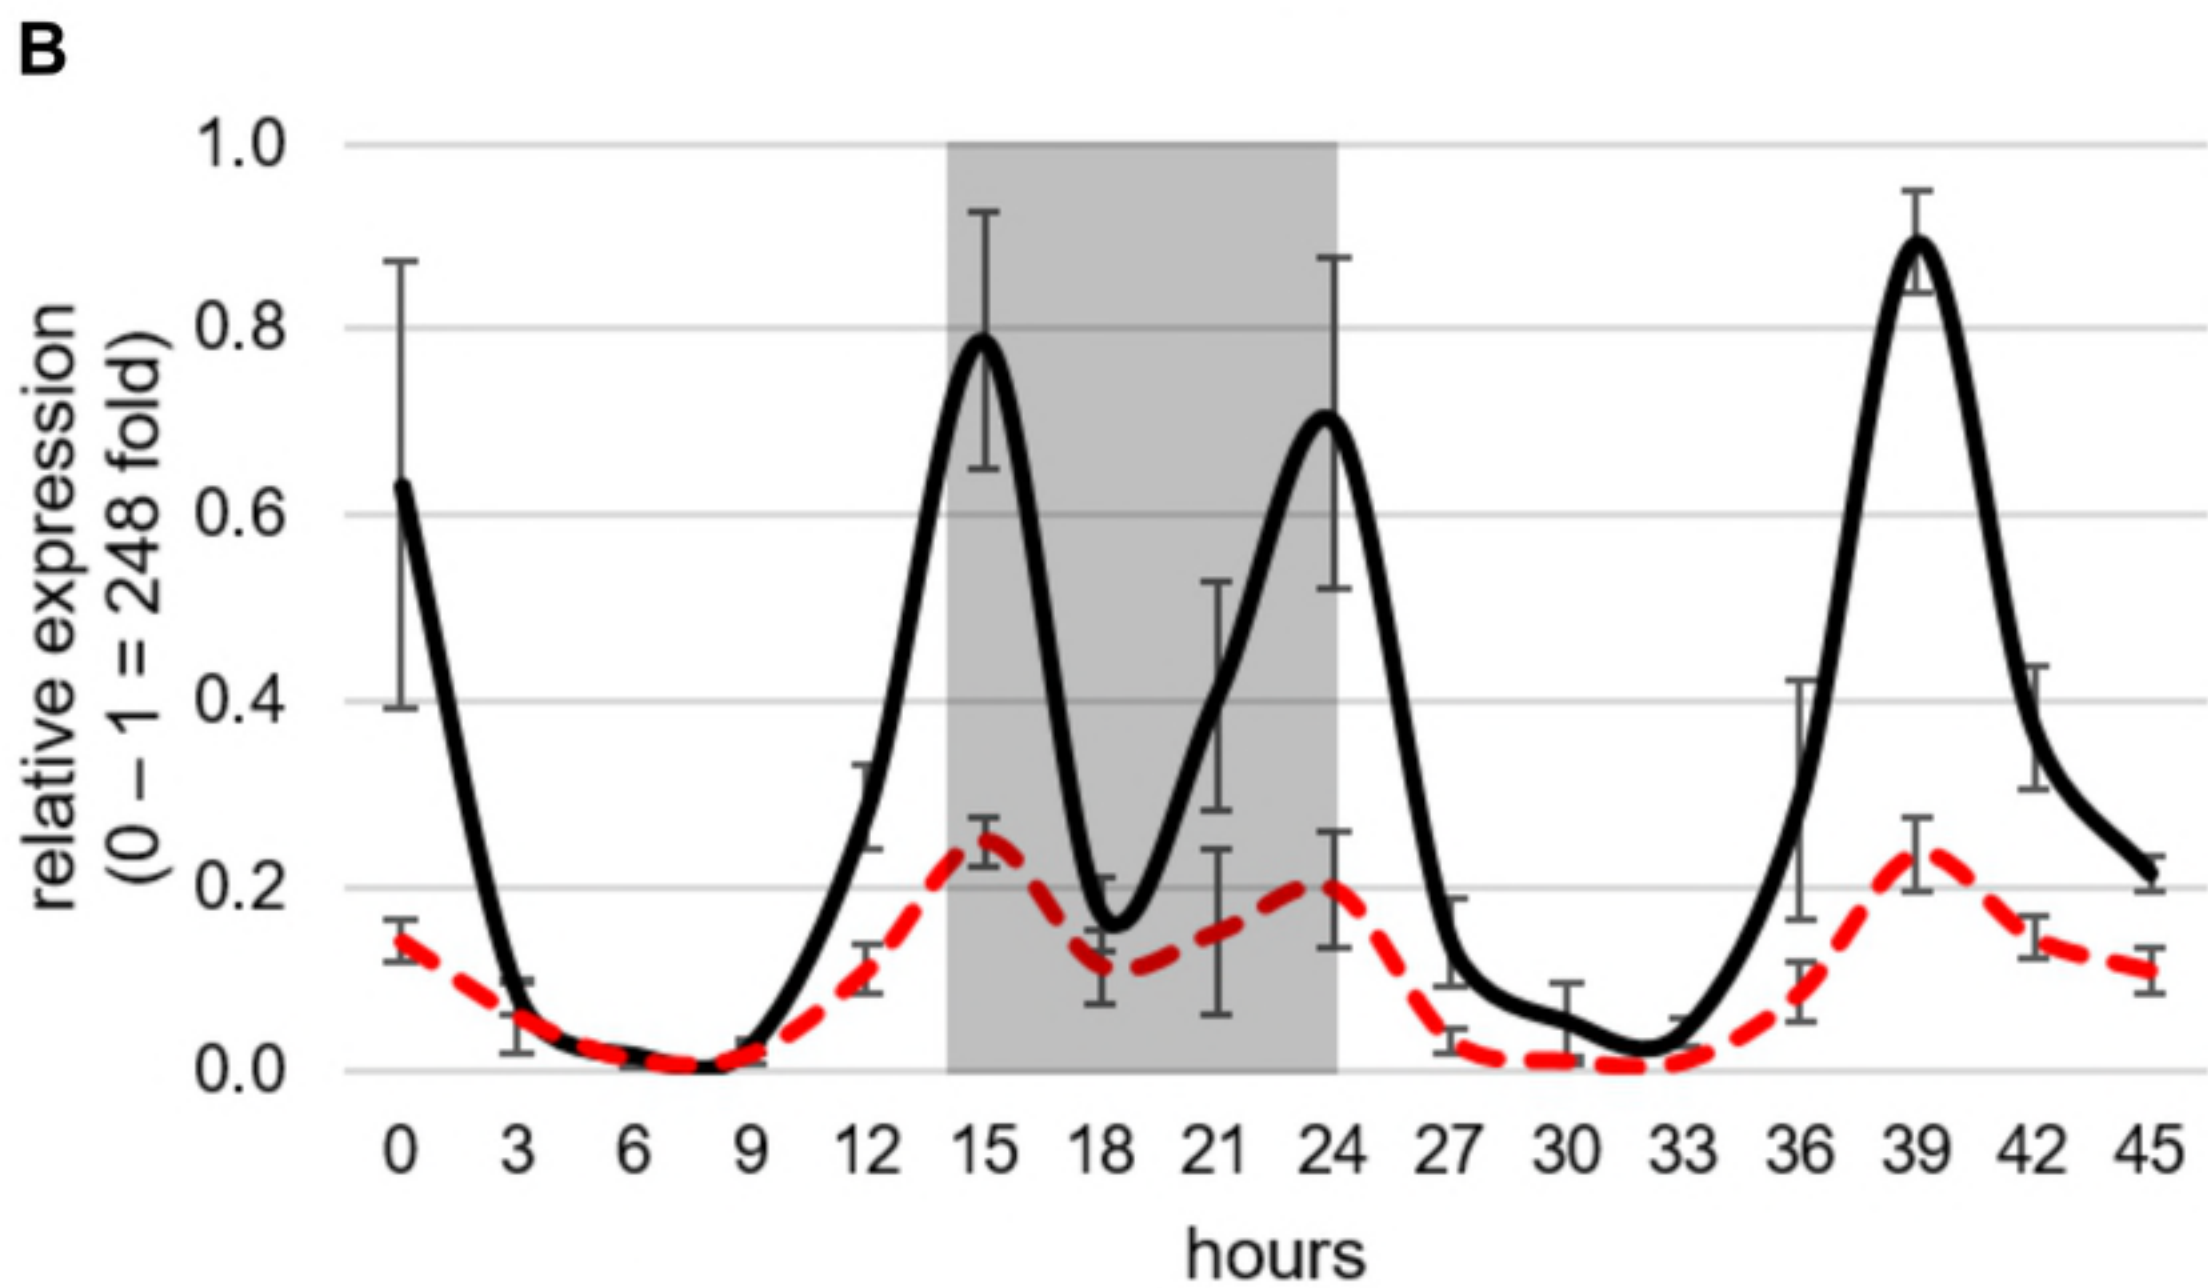

Figure 1`

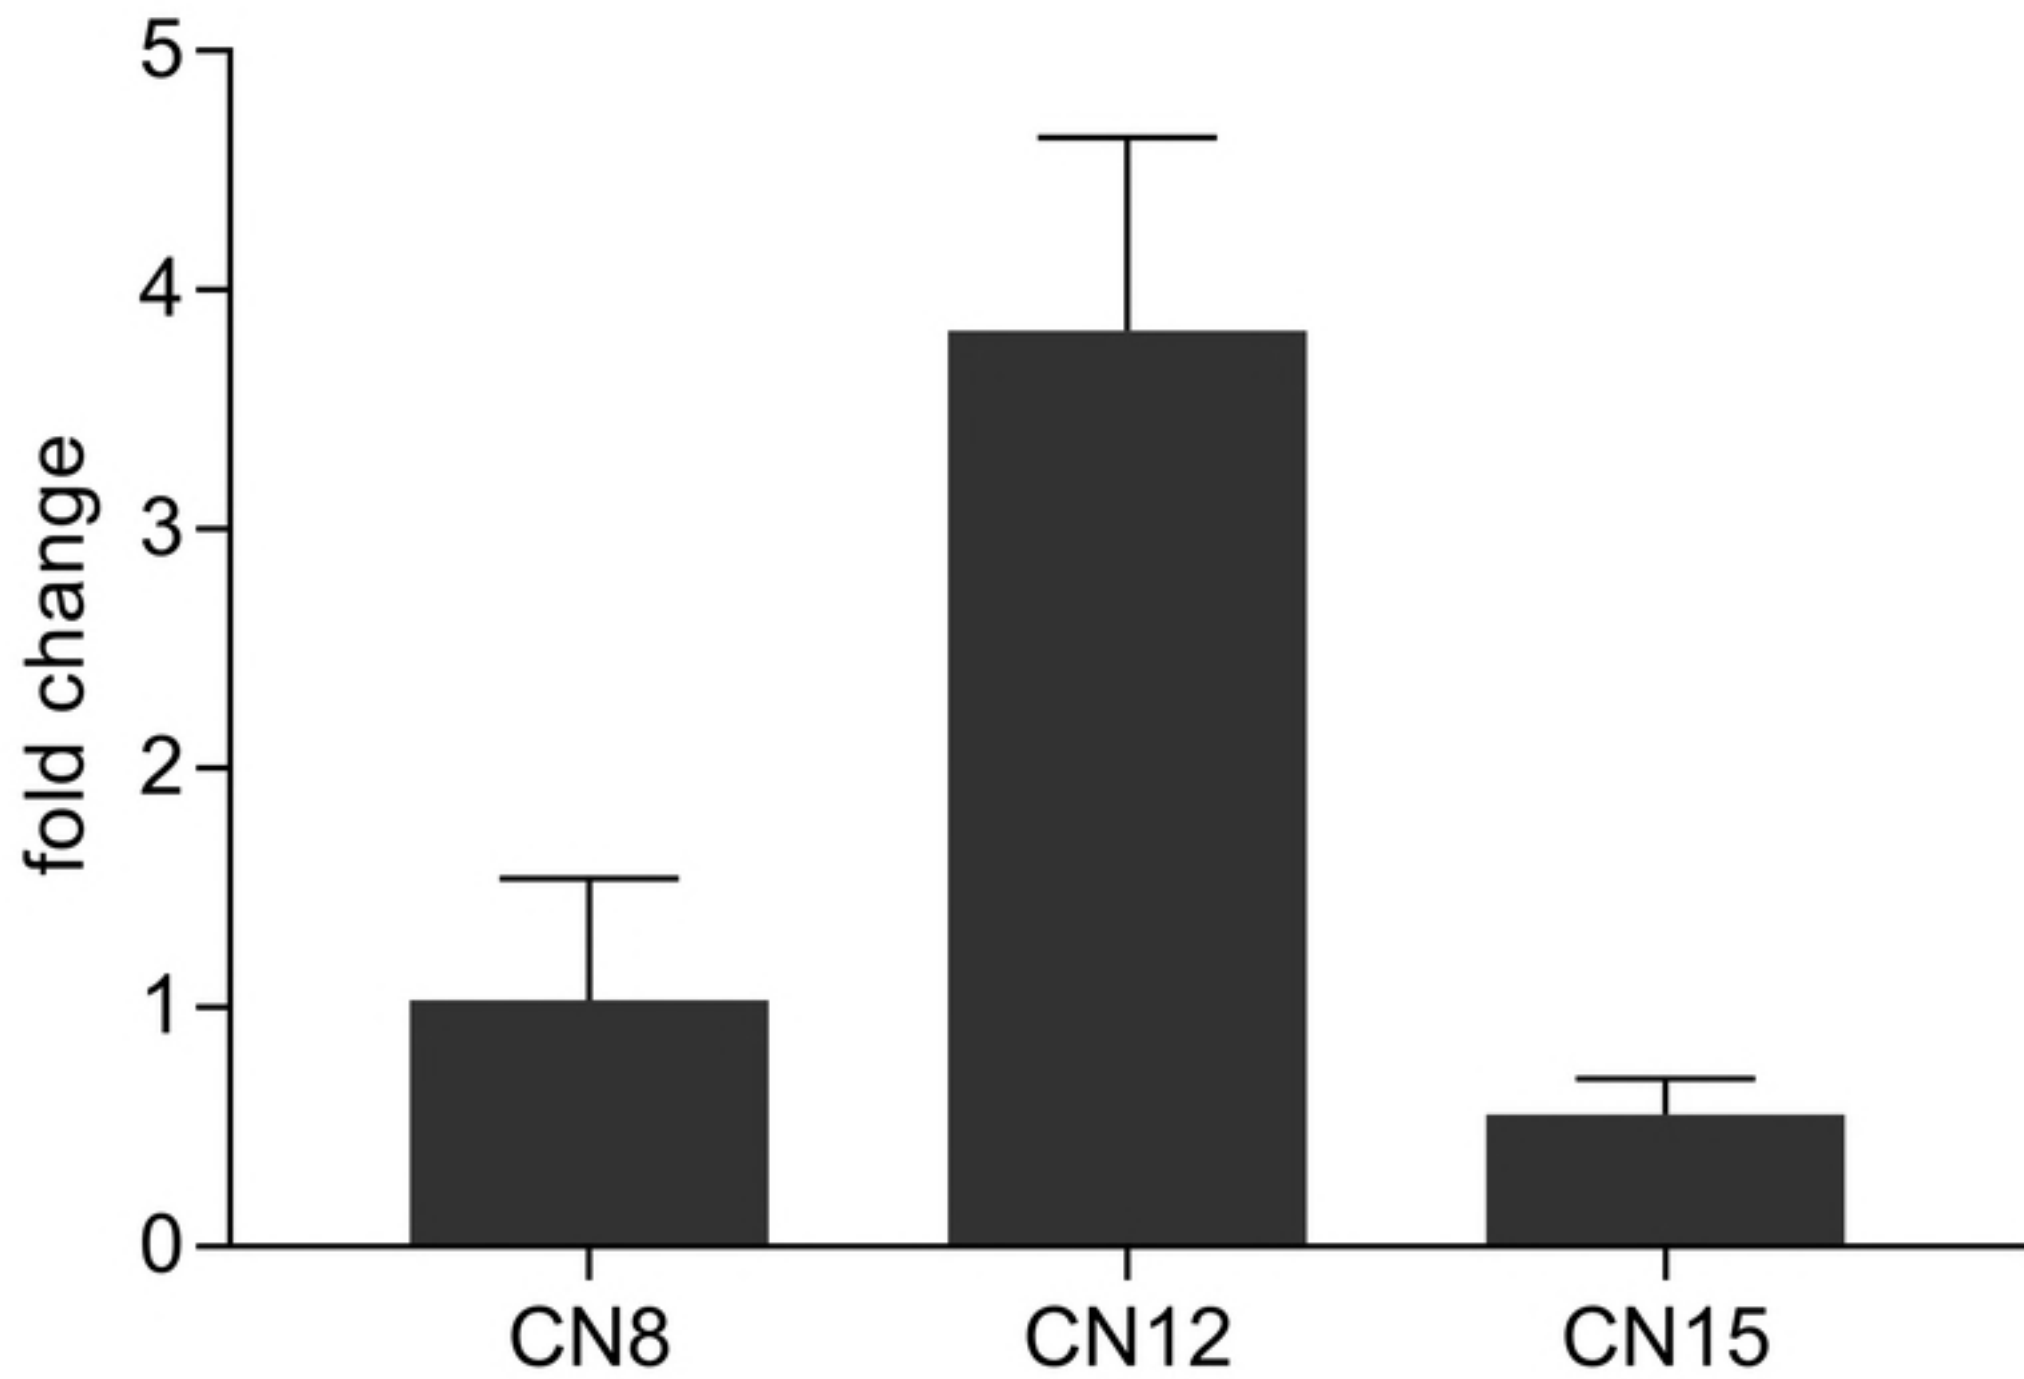

Figure 2

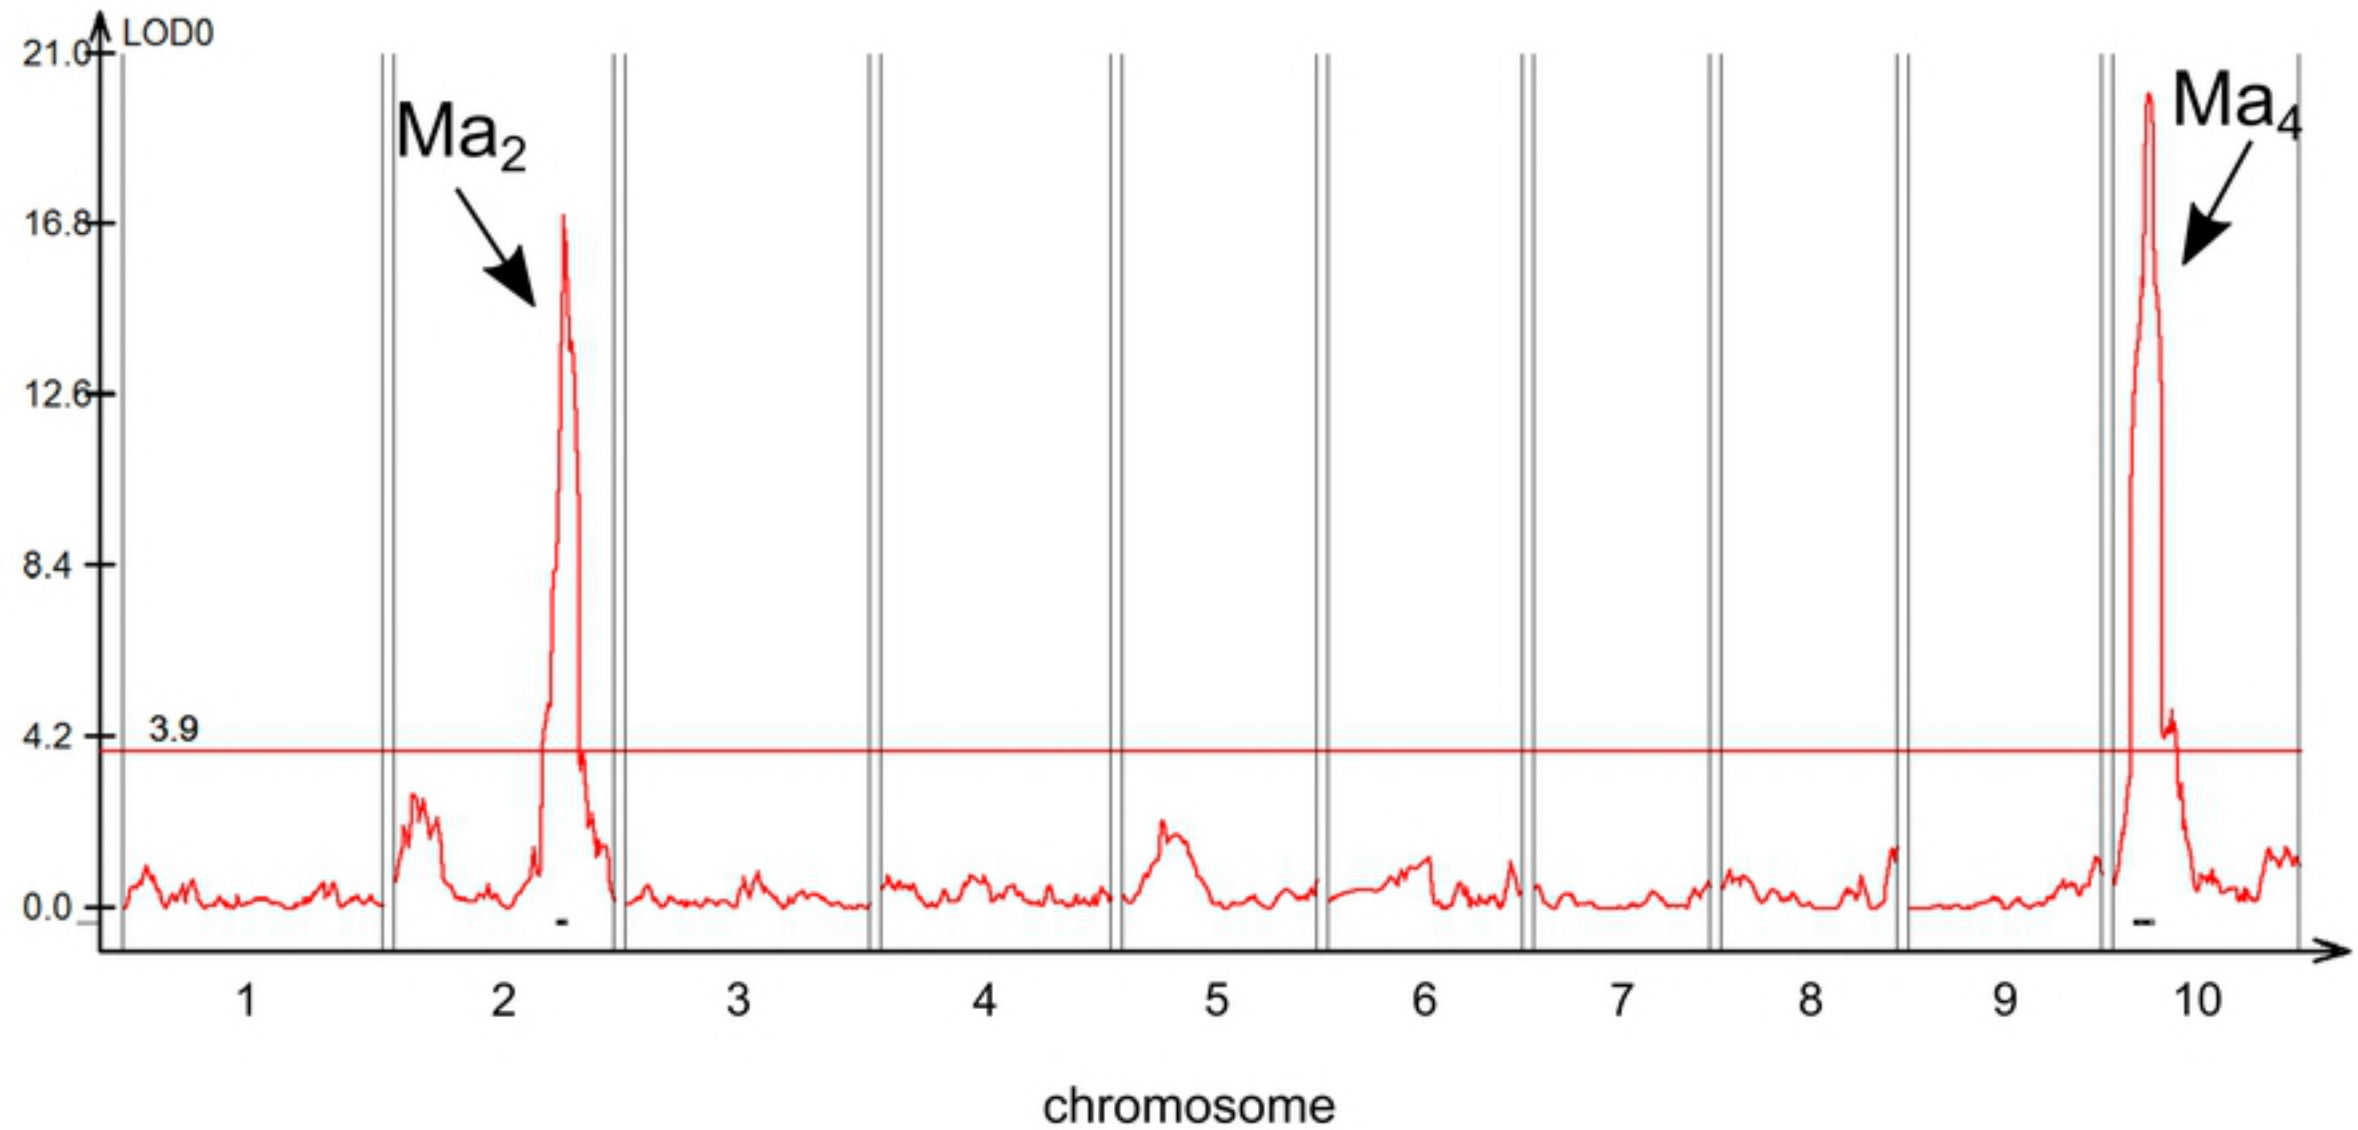

Figure 3

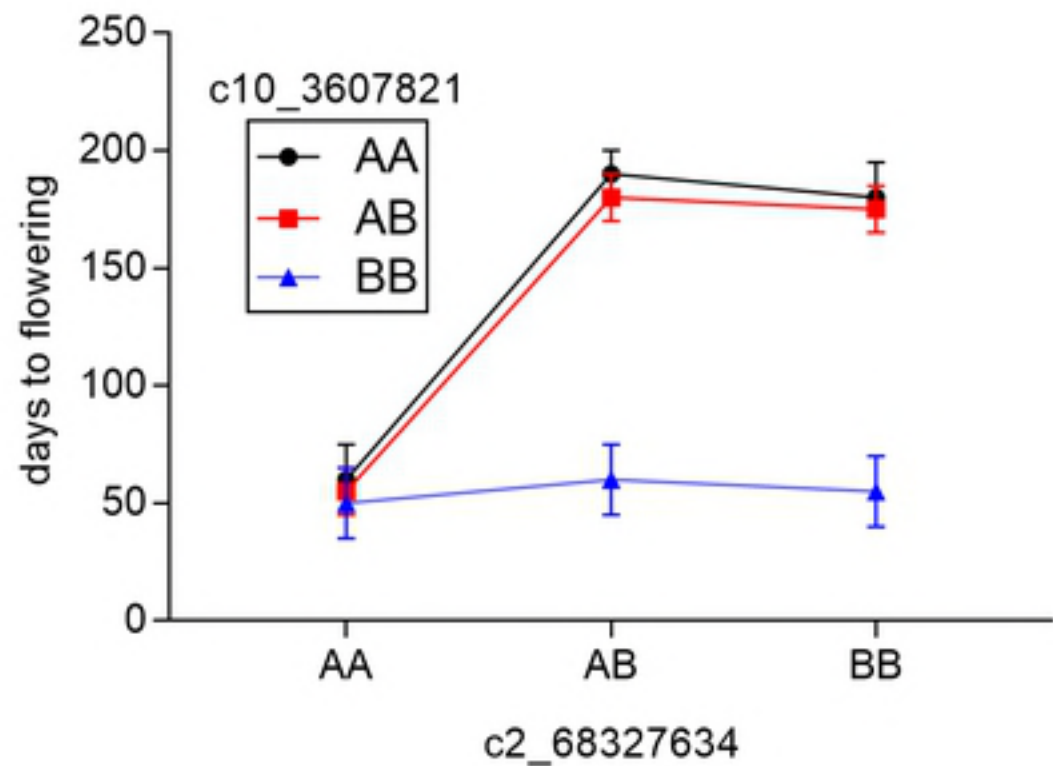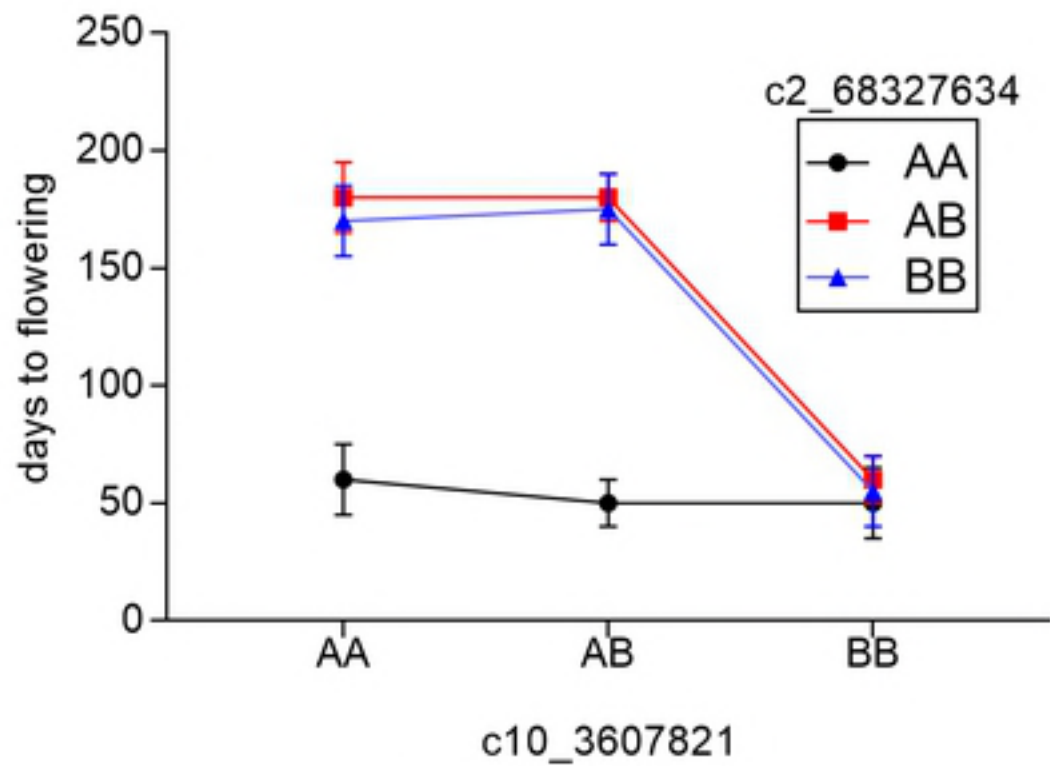

Figure 4



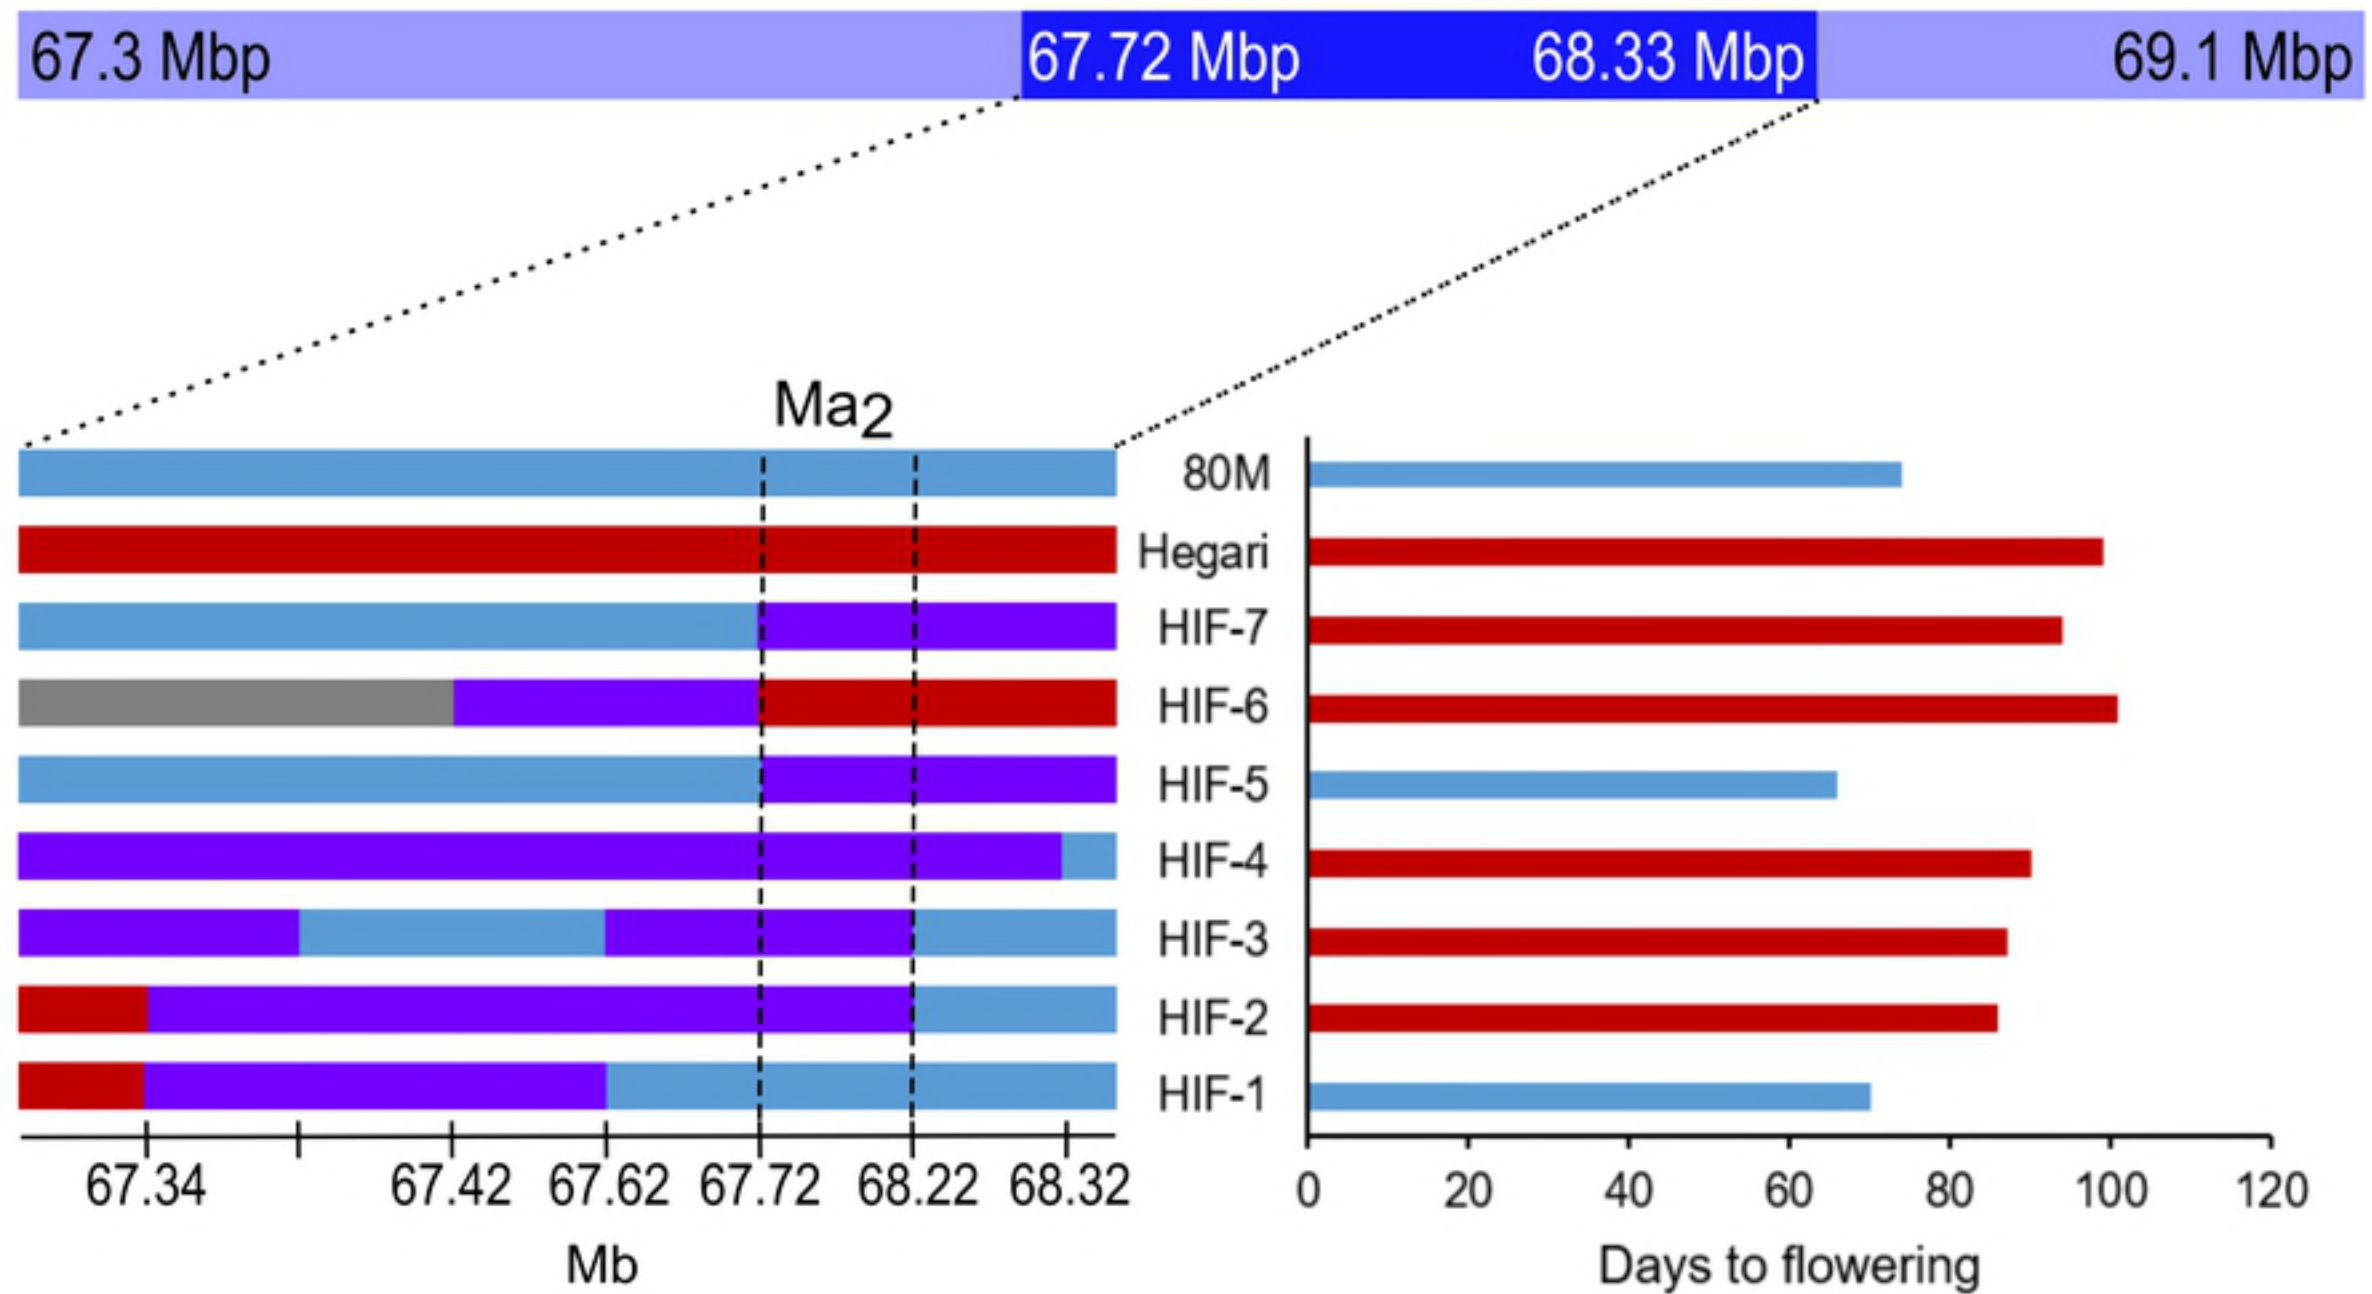

Figure 5



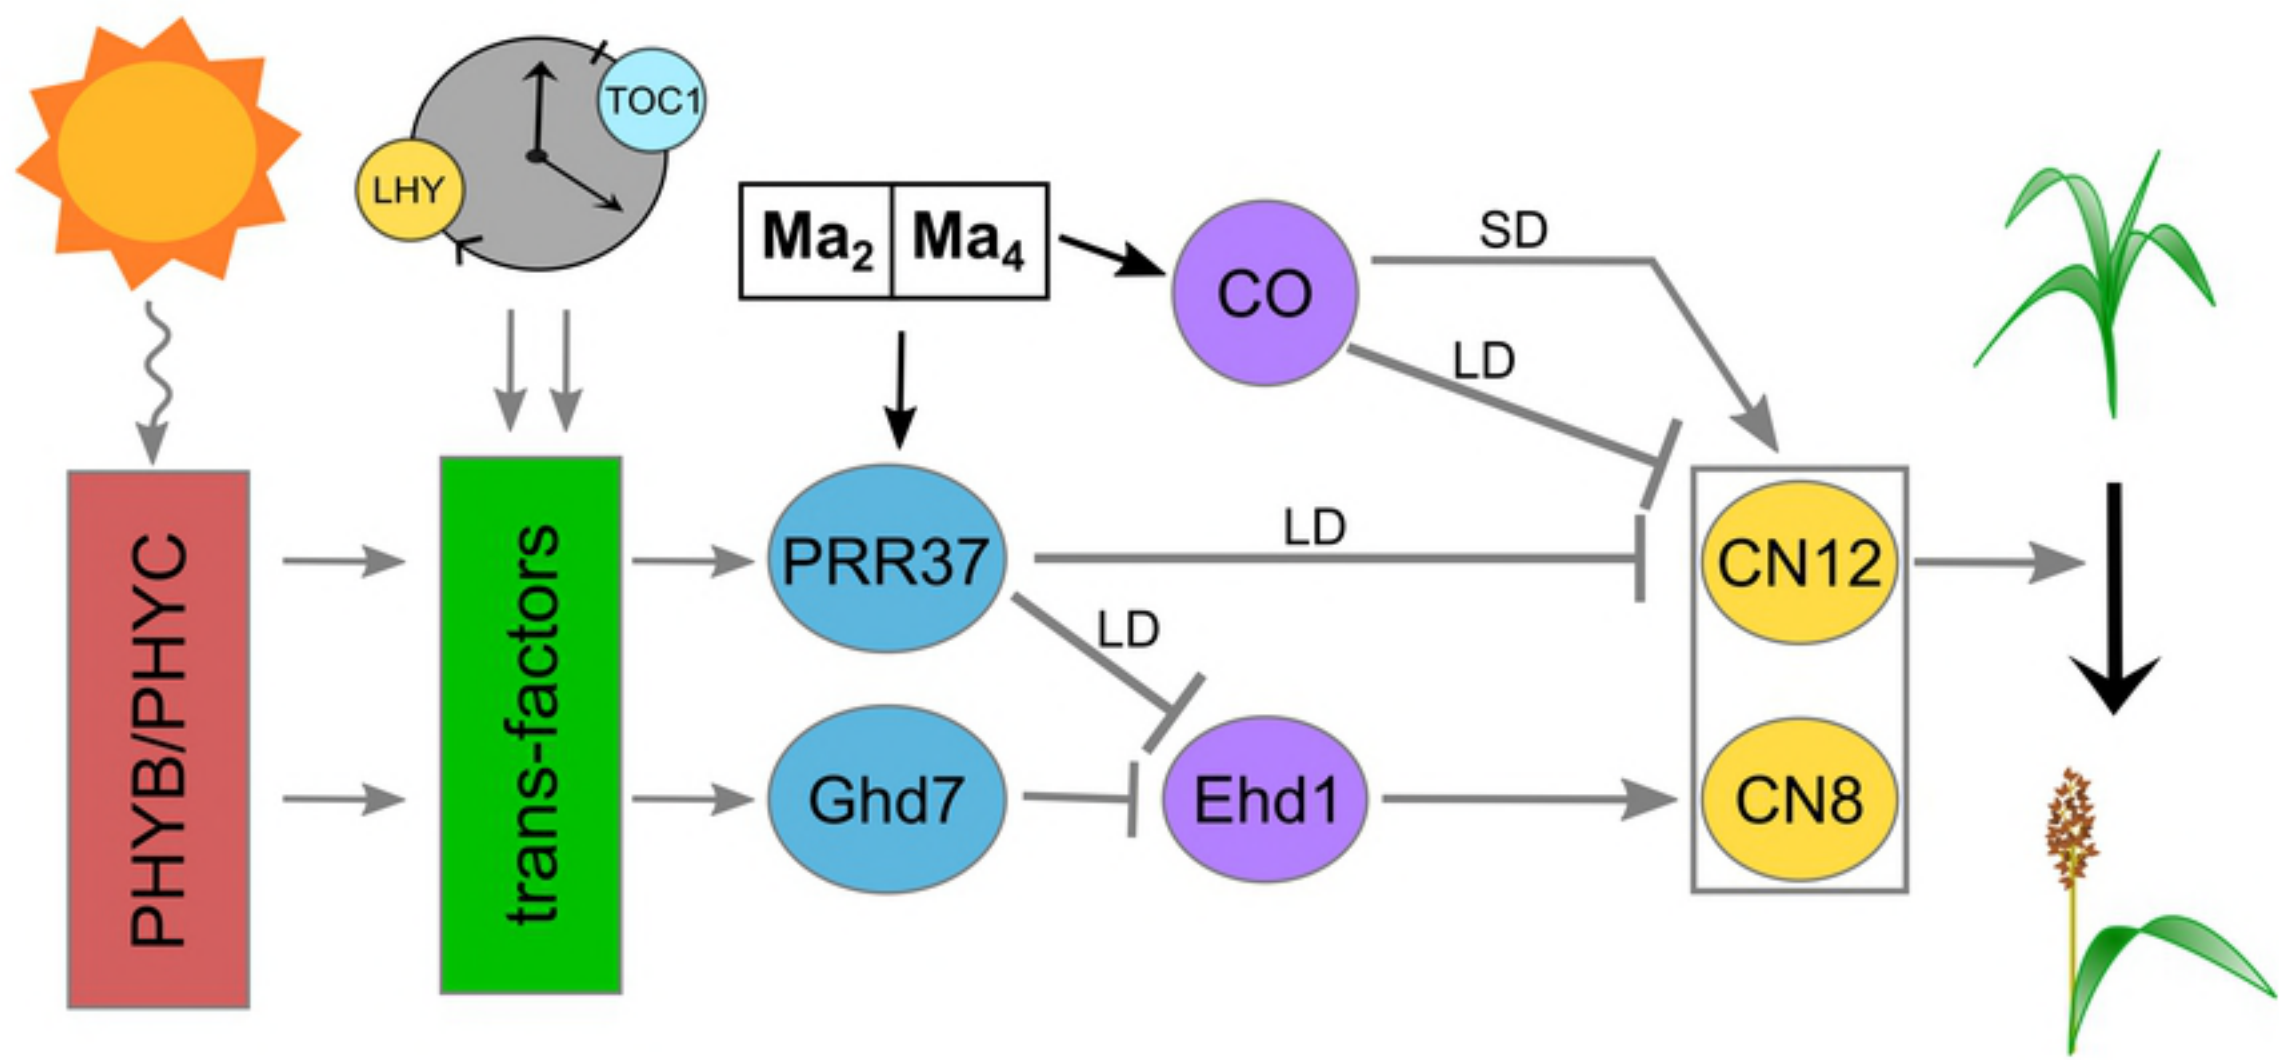

Figure 7



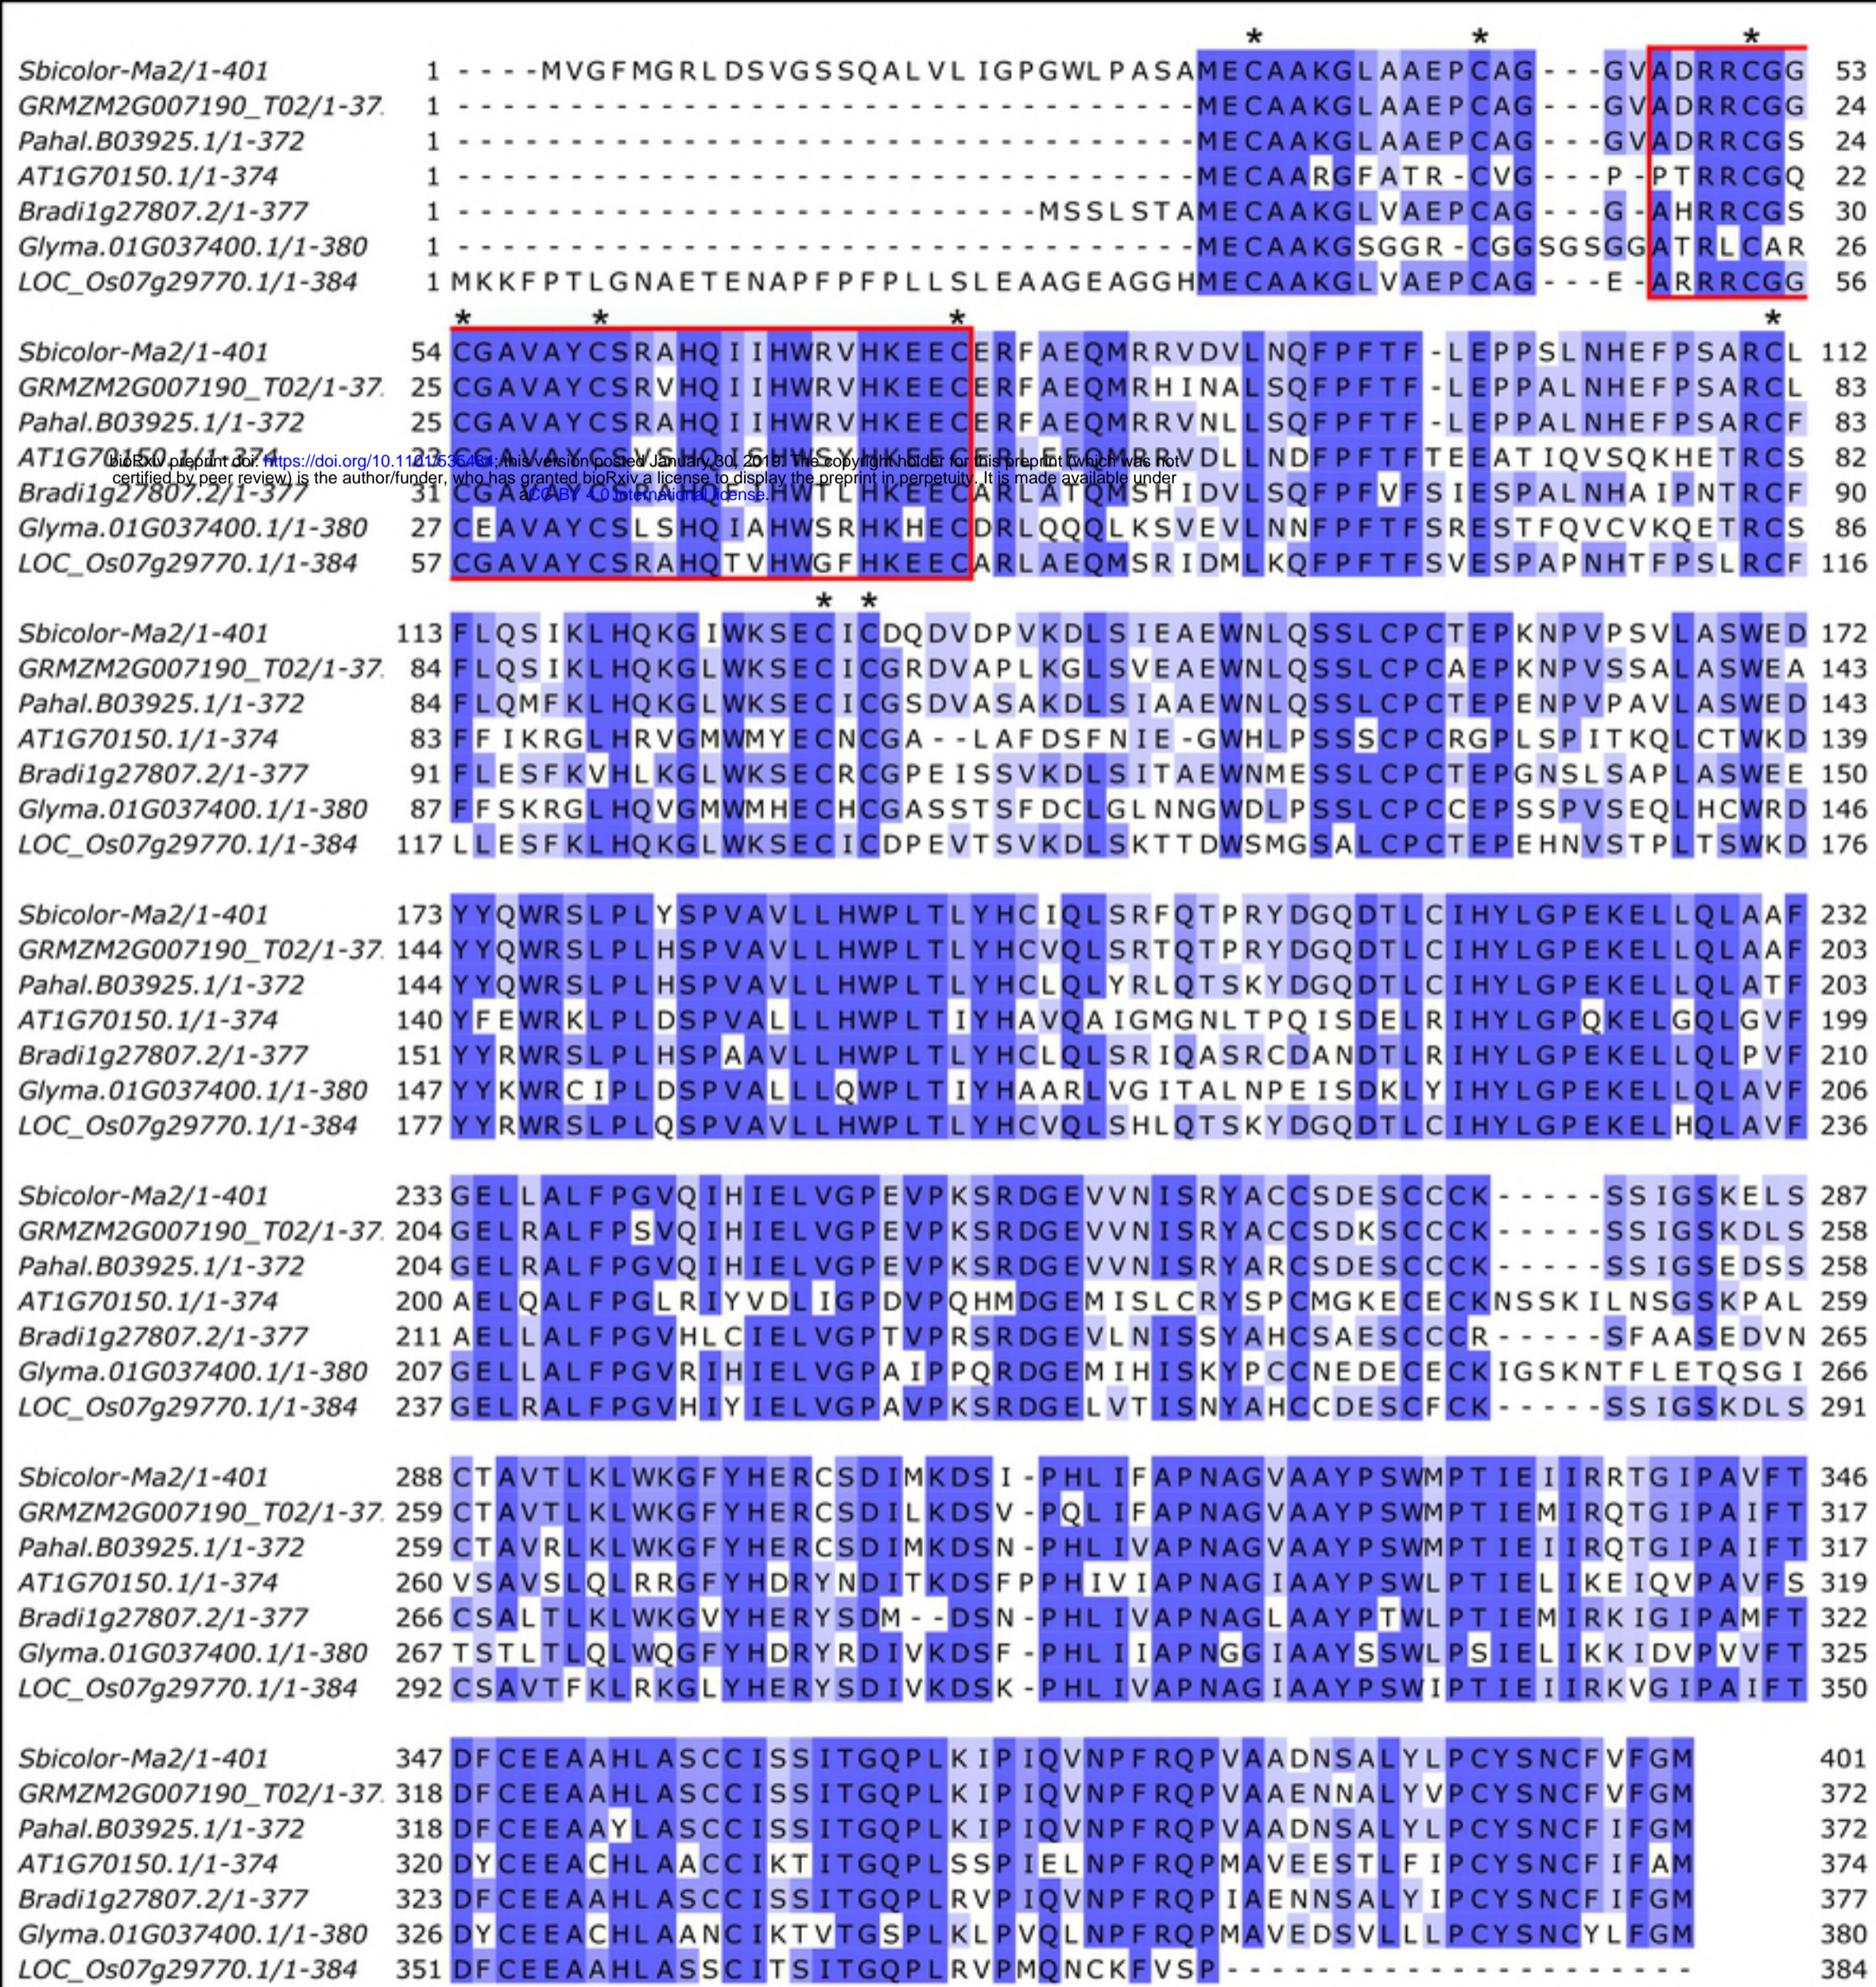

Figure 6
